# Supplementary material for: Phosphine-substituted diiron complexes Fe2(μ-Rodt)(CO)6−n(PPh3)n(R = Ph, Me, H andn= 1, 2) featuring desymmetrized oxadithiolate bridges: structures, protonation, and electrocatalysis
Source: Royal Society of Chemistry journal article supplement (doi:10.1039/d1nj03398k), 2021-01-01
Supplement: d1nj03398k1.pdf [file d1nj03398k1.pdf]

## Supporting Information for

### **Phosphine-substituted diiron complexes $\text{Fe}_2(\mu\text{-Rodt})(\text{CO})_{6-n}(\text{PPh}_3)_n$ ( $\text{R} = \text{Ph}, \text{Me}, \text{H}$ and $n = 1, 2$ ) featuring desymmetrized oxadithiolate bridges: Structures, protonation, and electrocatalysis**

Xiao-Li Gu,<sup>#</sup> Jian-Rong Li,<sup>#</sup> Bo Jin, Yang Guo, Xing-Bin Jing and Pei-Hua Zhao \*

School of Materials Science and Engineering, North University of China, Taiyuan  
030051, P. R. China

\*Corresponding author.

Email: zph2004@nuc.edu.cn (P.-H. Zhao).

<sup>#</sup>The two authors equally contributed to this work.

## Contents

### **Part I. Crystallographic data for complexes 4 and 7-9**

*p6* **Table S1.** Details of crystallographic data and structure refinement for **4** and **7-9**

### **Part II. Additional protonation data for complexes 4-6 and 7-9.**

*p7* **Figure S1.** Comparison for FT-IR spectra (2700-1800 cm<sup>-1</sup>, KBr disk) of the monosubstituted complexes **4** (a), **5** (b), and **6** (c) with 0 (black line) versus 10 (red line) equivalents of strong acid TFA. *Insert:* An enlarged FT-IR spectrum in the region of 2600-2400 cm<sup>-1</sup> in Figures S1a-1c.

*p8* **Figure S2.** <sup>31</sup>P{<sup>1</sup>H} NMR spectrum of the monosubstituted complex **4** (0.015 mmol) with 10 equivalents of strong acid CF<sub>3</sub>CO<sub>2</sub>H (TFA) in CDCl<sub>3</sub> (0.5 mL) at 298 K for 4 h. *Insert:* The proposed structure of the protonated species [**4**(μH)]<sup>+</sup>.

*p9* **Figure S3.** <sup>31</sup>P{<sup>1</sup>H} NMR spectrum of the monosubstituted complex **5** (0.015 mmol) with 10 equivalents of strong acid CF<sub>3</sub>CO<sub>2</sub>H (TFA) in CDCl<sub>3</sub> (0.5 mL) at 298 K for 4 h. *Insert:* The proposed structure of the protonated species [**5**(μH)]<sup>+</sup>.

*p10* **Figure S4.** <sup>31</sup>P{<sup>1</sup>H} NMR spectrum of the monosubstituted complex **6** (0.015 mmol) with 10 equivalents of strong acid CF<sub>3</sub>CO<sub>2</sub>H (TFA) in CDCl<sub>3</sub> (0.5 mL) at 298 K for 4 h. *Insert:* The proposed structure of the protonated species [**6**(μH)]<sup>+</sup>.

*p11* **Figure S5.** High-field region <sup>1</sup>H NMR spectrum of the monosubstituted complex **5** (0.015 mmol) with 10 equivalents of strong acid CF<sub>3</sub>CO<sub>2</sub>H (TFA) in CDCl<sub>3</sub> (0.5 mL) at 298 K for 4 h. *Insert:* The proposed structure of the protonated species [**5**(μH)]<sup>+</sup>.

*p12* **Figure S6.** High-field region <sup>1</sup>H NMR spectra of the monosubstituted complexes **4** and **6** (0.015 mmol) with 10 equivalents of strong acid CF<sub>3</sub>CO<sub>2</sub>H (TFA) in CDCl<sub>3</sub> (0.5 mL) at 298 K for 4 h.

*p13* **Figure S7.** Comparison for FT-IR spectra (2700-1800 cm<sup>-1</sup>, KBr disk) of the disubstituted complexes **7** (a), **8** (b), and **9** (c) with 0 (black line) versus 10 (red line) equivalents of strong acid TFA. *Insert:* An enlarged FT-IR spectrum in the region of 2600-2400 cm<sup>-1</sup> in Figures S7a-7c.

*p14* **Figure S8.** High-field region  $^1\text{H}$  NMR spectrum of the disubstituted complex **7** (0.015 mmol) with 10 equivalents of strong acid  $\text{CF}_3\text{CO}_2\text{H}$  (TFA) in  $\text{CDCl}_3$  (0.5 mL) at 298 K for 3 h. *Insert:* The proposed isomeric structures of the protonated species  $[\mathbf{7}(\mu\text{H})]^+$ .

*p15* **Figure S9.** High-field region  $^1\text{H}$  NMR spectrum of the disubstituted complex **8** (0.015 mmol) with 10 equivalents of strong acid  $\text{CF}_3\text{CO}_2\text{H}$  (TFA) in  $\text{CDCl}_3$  (0.5 mL) at 298 K for 3 h. *Insert:* The proposed isomeric structures of the protonated species  $[\mathbf{8}(\mu\text{H})]^+$ .

*p16* **Figure S10.** High-field region  $^1\text{H}$  NMR spectrum of the disubstituted complex **9** (0.015 mmol) with 10 equivalents of strong acid  $\text{CF}_3\text{CO}_2\text{H}$  (TFA) in  $\text{CDCl}_3$  (0.5 mL) at 298 K for 3 h. *Insert:* The proposed isomeric structures of the protonated species  $[\mathbf{9}(\mu\text{H})]^+$ .

*p17* **Figure S11.**  $^{31}\text{P}\{^1\text{H}\}$  NMR spectra of the disubstituted complex **7** (0.015 mmol) with 0 versus 10 equivalents of strong acid  $\text{CF}_3\text{CO}_2\text{H}$  (TFA) in  $\text{CDCl}_3$  (0.5 mL) at 298 K for 3 h. *Insert:* The proposed isomeric structures of the protonated species  $[\mathbf{7}(\mu\text{H})]^+$ .

*p18* **Figure S12.**  $^{31}\text{P}\{^1\text{H}\}$  NMR spectra of the disubstituted complex **8** (0.015 mmol) with 0 versus 10 equivalents of strong acid  $\text{CF}_3\text{CO}_2\text{H}$  (TFA) in  $\text{CDCl}_3$  (0.5 mL) at 298 K for 3 h. *Insert:* The proposed isomeric structures of the protonated species  $[\mathbf{8}(\mu\text{H})]^+$ .

*p19* **Figure S13.**  $^{31}\text{P}\{^1\text{H}\}$  NMR spectra of the disubstituted complex **9** (0.015 mmol) with 0 versus 10 equivalents of strong acid  $\text{CF}_3\text{CO}_2\text{H}$  (TFA) in  $\text{CDCl}_3$  (0.5 mL) at 298 K for 3 h. *Insert:* The proposed isomeric structures of the protonated species  $[\mathbf{9}(\mu\text{H})]^+$ .

*p20* **Figure S14.** FT-IR spectra (a-f) recorded for the *in situ* protonations of the mono- and disubstituted complexes **4-6** and **7-9** (0.015 mmol) with 0 versus 10 equivalents of weak acid  $\text{CH}_3\text{CO}_2\text{H}$  (HOAc) in 5 mL  $\text{CH}_2\text{Cl}_2$  at 298 K for 8 h, respectively.

### **Part III. Electrolysis experiments and TONs calculations of complexes 4-6 and 7-9**

*p21* **Scheme S1.** Two electrocatalytic proton reduction processes I and II of a representative precursor **4** (for the monosubstituted complexes **4-6**) at  $E_{pc1} = -1.76$  V through a proposed ECCE mechanism and at  $E_{pc3} = -1.65$  V through a suggested ECEC mechanism in the presence of TFA as a proton source, respectively, wherein the Rodt, CO, and  $\text{PPh}_3$  ligands are omitted for clarity.

*p22* **Scheme S2.** Two electrocatalytic proton reduction processes I and II of a representative precursor **7** (for the disubstituted complexes **7-9**) at  $E_{pc3} = -1.55$  V through a proposed

ECEC mechanism and at  $E_{pc4} = -1.70$  V through a suggested CEEC mechanism in the presence of TFA as a proton source, respectively, wherein the Rodt, CO, and PPh<sub>3</sub> ligands are omitted for clarity.

*p23* **Scheme S3.** Electrocatalytic proton reduction process of two representative precursors **4** (for the monosubstituted complexes **4-6**) at  $E_{pc2} = -2.17$  V and **7** (for the disubstituted complexes **7-9**) at  $E_{pc2} = -2.19$  V via a suggested EECC mechanism in the presence of HOAc as a proton source, respectively, wherein the Rodt, CO, and PPh<sub>3</sub> ligands are omitted for clarity.

*p24* **Figure S15.** CV curves of 1.0 mM complexes **4-6** (a-c) and **7-9** (e-f) with weak acid HOAc (0–10 mM) in 0.1 M *n*-Bu<sub>4</sub>NPF<sub>6</sub>/MeCN at a scan rate of 0.05 V s<sup>-1</sup>. *Inserts* in (a-c) and (e-f): Plots of catalytic currents ( $i_{cat}$ ,  $\mu$ A) of **4-6** and **7-9** with increasing acid concentrations ([HOAc], mM), respectively. All potentials are versus the ferrocene/ferrocenium (Fc<sup>0/+</sup>) couple.

*p25* **Figure S16.** Controlled-potential electrolysis experiments (i-t curves) of complexes **4-6** (0.5 mM, a-c) and **7-9** (0.5 mM, d-f) in 5 mM strong acid TFA/MeCN solution for 5 h at -2.30 V vs. Ag/AgNO<sub>3</sub>.

*p26* **Figure S17.** Controlled-potential electrolysis experiments (i-t curves) of complexes **4-6** (0.5 mM, a-c) and **7-9** (0.5 mM, d-f) in 5 mM weak acid HOAc/MeCN solution for 5 h at -2.30 V vs. Ag/AgNO<sub>3</sub>.

*p27* **Figure S18.** Q-t curves and TONs calculations of complexes **4-6** (0.5 mM, a-c) and **7-9** (0.5 mM, d-f) in 5 mM strong acid TFA/MeCN solution for 5 h at -2.30 V vs. Ag/AgNO<sub>3</sub>, respectively.

*p28* **Figure S19.** Q-t curves and TONs calculations of complexes **4-6** (0.5 mM, a-c) and **7-9** (0.5 mM, d-f) in 5 mM weak acid HOAc/MeCN solution for 5 h at -2.30 V vs. Ag/AgNO<sub>3</sub>, respectively.

#### **Part IV. The IR and NMR spectra for complexes 1, 2, 4-6 and 7-9**

*p29* **Figure S20.** FT-IR spectrum of Fe<sub>2</sub>( $\mu$ -Phodt)(CO)<sub>6</sub> (**1**) in KBr.

*p30* **Figure S21.** <sup>1</sup>H NMR spectrum of Fe<sub>2</sub>( $\mu$ -Phodt)(CO)<sub>6</sub> (**1**) in CDCl<sub>3</sub> (600 MHz, TMS).

*p31* **Figure S22.** FT-IR spectrum of Fe<sub>2</sub>( $\mu$ -Meodt)(CO)<sub>6</sub> (**2**) in KBr.

*P32* **Figure S23.** <sup>1</sup>H NMR spectrum of Fe<sub>2</sub>( $\mu$ -Meodt)(CO)<sub>6</sub> (**2**) in CDCl<sub>3</sub> (600 MHz, TMS).

*p33* **Figure S24.** FT-IR spectrum of  $\text{Fe}_2(\mu\text{-odt})(\text{CO})_6$  (**3**) in KBr.

*p34* **Figure S25.** FT-IR spectrum of  $\text{Fe}_2(\mu\text{-Phodt})(\text{CO})_5(\text{PPh}_3)$  (**4**) in KBr.

*p35* **Figure S26.**  $^1\text{H}$  NMR spectrum of  $\text{Fe}_2(\mu\text{-Phodt})(\text{CO})_5(\text{PPh}_3)$  (**4**) in  $\text{CDCl}_3$  (600 MHz, TMS).

*p36* **Figure S27.**  $^{31}\text{P}\{^1\text{H}\}$  NMR spectrum of  $\text{Fe}_2(\mu\text{-Phodt})(\text{CO})_5(\text{PPh}_3)$  (**4**) in  $\text{CDCl}_3$  (243 MHz, 85%  $\text{H}_3\text{PO}_4$ ).

*p37* **Figure S28.** FT-IR spectrum of  $\text{Fe}_2(\mu\text{-Meodt})(\text{CO})_5(\text{PPh}_3)$  (**5**) in KBr.

*p38* **Figure S29.**  $^1\text{H}$  NMR spectrum of  $\text{Fe}_2(\mu\text{-Meodt})(\text{CO})_5(\text{PPh}_3)$  (**5**) in  $\text{CDCl}_3$  (600 MHz, TMS).

*p39* **Figure S30.**  $^{31}\text{P}\{^1\text{H}\}$  NMR spectrum of  $\text{Fe}_2(\mu\text{-Meodt})(\text{CO})_5(\text{PPh}_3)$  (**5**) in  $\text{CDCl}_3$  (243 MHz, 85%  $\text{H}_3\text{PO}_4$ ).

*p40* **Figure S31.** FT-IR spectrum of  $\text{Fe}_2(\mu\text{-odt})(\text{CO})_5(\text{PPh}_3)$  (**6**) in KBr.

*p41* **Figure S32.**  $^1\text{H}$  NMR spectrum of  $\text{Fe}_2(\mu\text{-odt})(\text{CO})_5(\text{PPh}_3)$  (**6**) in  $\text{CDCl}_3$  (600 MHz, TMS).

*p42* **Figure S33.**  $^{31}\text{P}\{^1\text{H}\}$  NMR spectrum of  $\text{Fe}_2(\mu\text{-odt})(\text{CO})_5(\text{PPh}_3)$  (**6**) in  $\text{CDCl}_3$  (243 MHz, 85%  $\text{H}_3\text{PO}_4$ ).

*p43* **Figure S34.** FT-IR spectrum of  $\text{Fe}_2(\mu\text{-Phodt})(\text{CO})_4(\text{PPh}_3)_2$  (**7**) in KBr.

*p44* **Figure S35.**  $^1\text{H}$  NMR spectrum of  $\text{Fe}_2(\mu\text{-Phodt})(\text{CO})_4(\text{PPh}_3)_2$  (**7**) in  $\text{CDCl}_3$  (600 MHz, TMS).

*p45* **Figure S36.**  $^{31}\text{P}\{^1\text{H}\}$  NMR spectrum of  $\text{Fe}_2(\mu\text{-Phodt})(\text{CO})_4(\text{PPh}_3)_2$  (**7**) in  $\text{CDCl}_3$  (243 MHz, 85%  $\text{H}_3\text{PO}_4$ ).

*p46* **Figure S37.** FT-IR spectrum of  $\text{Fe}_2(\mu\text{-Meodt})(\text{CO})_4(\text{PPh}_3)_2$  (**8**) in KBr.

*p47* **Figure S38.**  $^1\text{H}$  NMR spectrum of  $\text{Fe}_2(\mu\text{-Meodt})(\text{CO})_4(\text{PPh}_3)_2$  (**8**) in  $\text{CDCl}_3$  (600 MHz, TMS).

*p48* **Figure S39.**  $^{31}\text{P}\{^1\text{H}\}$  NMR spectrum of  $\text{Fe}_2(\mu\text{-Meodt})(\text{CO})_4(\text{PPh}_3)_2$  (**8**) in  $\text{CDCl}_3$  (243 MHz, 85%  $\text{H}_3\text{PO}_4$ ).

*p49* **Figure S40.** FT-IR spectrum of  $\text{Fe}_2(\mu\text{-odt})(\text{CO})_4(\text{PPh}_3)_2$  (**9**) in KBr.

*p50* **Figure S41.**  $^1\text{H}$  NMR spectrum of  $\text{Fe}_2(\mu\text{-odt})(\text{CO})_4(\text{PPh}_3)_2$  (**9**) in  $\text{CDCl}_3$  (600 MHz, TMS).

*p51* **Figure S42.**  $^{31}\text{P}\{^1\text{H}\}$  NMR spectrum of  $\text{Fe}_2(\mu\text{-odt})(\text{CO})_4(\text{PPh}_3)_2$  (**9**) in  $\text{CDCl}_3$  (243 MHz, 85%  $\text{H}_3\text{PO}_4$ ).

**Part I. Crystallographic data for complexes 4 and 7-9**

**Table S1.** Details of crystallographic data and structure refinement for **4** and **7-9**

| <b>Complex</b>                                                              | <b>4</b>                                                                       | <b>7</b>                                                                                     | <b>8</b>                                                                                     | <b>9</b>                                                                                     |
|-----------------------------------------------------------------------------|--------------------------------------------------------------------------------|----------------------------------------------------------------------------------------------|----------------------------------------------------------------------------------------------|----------------------------------------------------------------------------------------------|
| <b>CCDC number</b>                                                          | <b>2083414</b>                                                                 | <b>2083415</b>                                                                               | <b>2083416</b>                                                                               | <b>2083417</b>                                                                               |
| Empirical formula                                                           | C <sub>31</sub> H <sub>23</sub> Fe <sub>2</sub> O <sub>6</sub> PS <sub>2</sub> | C <sub>48</sub> H <sub>38</sub> Fe <sub>2</sub> O <sub>5</sub> P <sub>2</sub> S <sub>2</sub> | C <sub>43</sub> H <sub>36</sub> Fe <sub>2</sub> O <sub>5</sub> P <sub>2</sub> S <sub>2</sub> | C <sub>42</sub> H <sub>34</sub> Fe <sub>2</sub> O <sub>5</sub> P <sub>2</sub> S <sub>2</sub> |
| Formula weight                                                              | 698.28                                                                         | 932.54                                                                                       | 870.532                                                                                      | 856.45                                                                                       |
| Temperature (K)                                                             | 150(2)                                                                         | 150(2)                                                                                       | 150(2)                                                                                       | 150(2)                                                                                       |
| Wavelength (Å)                                                              | 0.71073                                                                        | 0.71073                                                                                      | 0.71073                                                                                      | 0.71073                                                                                      |
| Crystal system                                                              | triclinic                                                                      | monoclinic                                                                                   | triclinic                                                                                    | triclinic                                                                                    |
| Space group                                                                 | P-1                                                                            | P2 <sub>1</sub> /c                                                                           | P-1                                                                                          | P-1                                                                                          |
| <i>a</i> (Å)                                                                | 9.0226(5)                                                                      | 14.3643(5)                                                                                   | 9.2488(6)                                                                                    | 9.2009(6)                                                                                    |
| <i>b</i> (Å)                                                                | 10.2799(6)                                                                     | 18.3822(7)                                                                                   | 13.4812(8)                                                                                   | 13.4863(10)                                                                                  |
| <i>c</i> (Å)                                                                | 17.7088(11)                                                                    | 17.9936(6)                                                                                   | 17.0713(11)                                                                                  | 16.7738(12)                                                                                  |
| $\alpha$ (°)                                                                | 96.927(3)                                                                      | 90                                                                                           | 77.746(3)                                                                                    | 77.342(4)                                                                                    |
| $\beta$ (°)                                                                 | 92.816(3)                                                                      | 110.0960(10)                                                                                 | 89.450(3)                                                                                    | 89.522(4)                                                                                    |
| $\gamma$ (°)                                                                | 115.474(2)                                                                     | 90                                                                                           | 70.192(3)                                                                                    | 70.674(4)                                                                                    |
| <i>V</i> (Å <sup>3</sup> )                                                  | 1462.63(15)                                                                    | 4461.9(3)                                                                                    | 1952.5(2)                                                                                    | 1911.7(2)                                                                                    |
| <i>Z</i>                                                                    | 2                                                                              | 4                                                                                            | 2                                                                                            | 2                                                                                            |
| <i>D</i> <sub>calc</sub> (g cm <sup>-3</sup> )                              | 1.586                                                                          | 1.388                                                                                        | 1.481                                                                                        | 1.488                                                                                        |
| $\mu$ (mm <sup>-1</sup> )                                                   | 1.233                                                                          | 0.861                                                                                        | 0.978                                                                                        | 0.997                                                                                        |
| <i>F</i> (000)                                                              | 712.0                                                                          | 1920.0                                                                                       | 898.7                                                                                        | 880.0                                                                                        |
| Crystal size (mm)                                                           | 0.26×0.18×0.14                                                                 | 0.32×0.22×0.14                                                                               | 0.22×0.18×0.14                                                                               | 0.34 × 0.28 × 0.18                                                                           |
| $\theta_{\min}$ , $\theta_{\max}$ (°)                                       | 4.444, 52.856                                                                  | 4.822, 52.766                                                                                | 4.52, 52.92                                                                                  | 4.56, 52.04                                                                                  |
| Reflections collected/unique                                                | 26250/6000                                                                     | 76335/9129                                                                                   | 32807/7955                                                                                   | 42182/7545                                                                                   |
| <i>R</i> <sub>int</sub>                                                     | 0.0524                                                                         | 0.0415                                                                                       | 0.0492                                                                                       | 0.1167                                                                                       |
| <i>hkl</i> Range                                                            | -11 ≤ <i>h</i> ≤ 11<br>-12 ≤ <i>k</i> ≤ 12<br>-22 ≤ <i>l</i> ≤ 22              | -17 ≤ <i>h</i> ≤ 17<br>-22 ≤ <i>k</i> ≤ 1622<br>-22 ≤ <i>l</i> ≤ 21                          | -11 ≤ <i>h</i> ≤ 11<br>-16 ≤ <i>k</i> ≤ 16<br>-21 ≤ <i>l</i> ≤ 21                            | -11 ≤ <i>h</i> ≤ 11<br>-16 ≤ <i>k</i> ≤ 16<br>-20 ≤ <i>l</i> ≤ 20                            |
| Completeness to $\theta_{\max}$ (%)                                         | 99.7                                                                           | 99.9                                                                                         | 98.7                                                                                         | 100.0                                                                                        |
| Data/restraints/parameters                                                  | 6000/0/379                                                                     | 9129/0/532                                                                                   | 7955/0/498                                                                                   | 7545/0/478                                                                                   |
| Goodness-of-fit (GOF) on <i>F</i> <sup>2</sup>                              | 1.013                                                                          | 1.074                                                                                        | 1.035                                                                                        | 1.141                                                                                        |
| <i>R</i> <sub>1</sub> / <i>wR</i> <sub>2</sub> [ <i>I</i> > 2σ( <i>I</i> )] | 0.0382/0.0901                                                                  | 0.0742/0.2205                                                                                | 0.0478/0.1271                                                                                | 0.0717/0.1139                                                                                |
| <i>R</i> <sub>1</sub> / <i>wR</i> <sub>2</sub> (all data)                   | 0.0608/0.1008                                                                  | 0.0909/0.2419                                                                                | 0.0744/0.1462                                                                                | 0.1173/0.1342                                                                                |
| Largest difference peak/ hole (e Å <sup>-3</sup> )                          | 0.35/-0.31                                                                     | 3.53/-0.71                                                                                   | 1.16/-0.74                                                                                   | 0.87/-0.49                                                                                   |

**Part II. Additional protonation data for complexes 4-6 and 7-9**

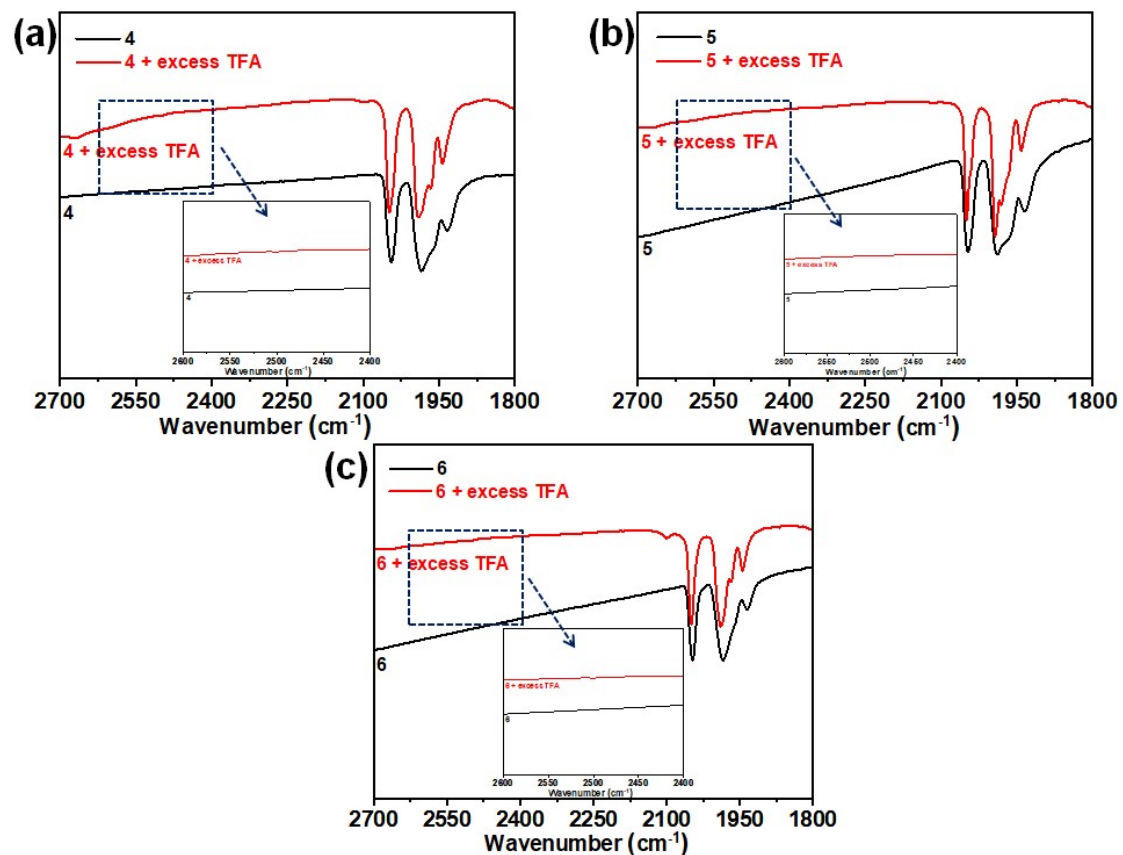

**Figure S1.** Comparison for FT-IR spectra (2700-1800 cm<sup>-1</sup>, KBr disk) of the monosubstituted complexes **4** (a), **5** (b), and **6** (c) with 0 (black line) versus 10 (red line) equivalents of strong acid TFA. *Insert:* An enlarged FT-IR spectrum in the region of 2600-2400 cm<sup>-1</sup> in Figures S1a-1c.

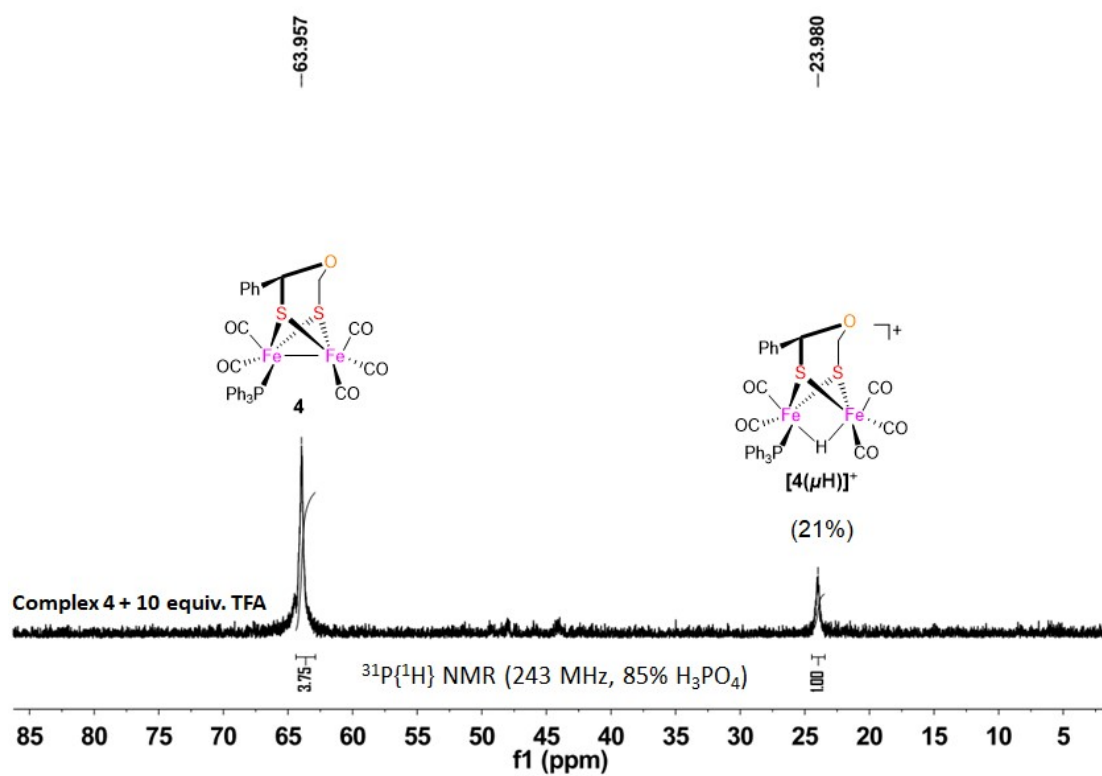

**Figure S2.**  $^{31}\text{P}\{^1\text{H}\}$  NMR spectrum of the monosubstituted complex **4** (0.015 mmol) with 10 equivalents of strong acid  $\text{CF}_3\text{CO}_2\text{H}$  (TFA) in  $\text{CDCl}_3$  (0.5 mL) at 298 K for 4 h. *Insert:* the proposed structure of the protonated species **[4(μH)]<sup>+</sup>**.



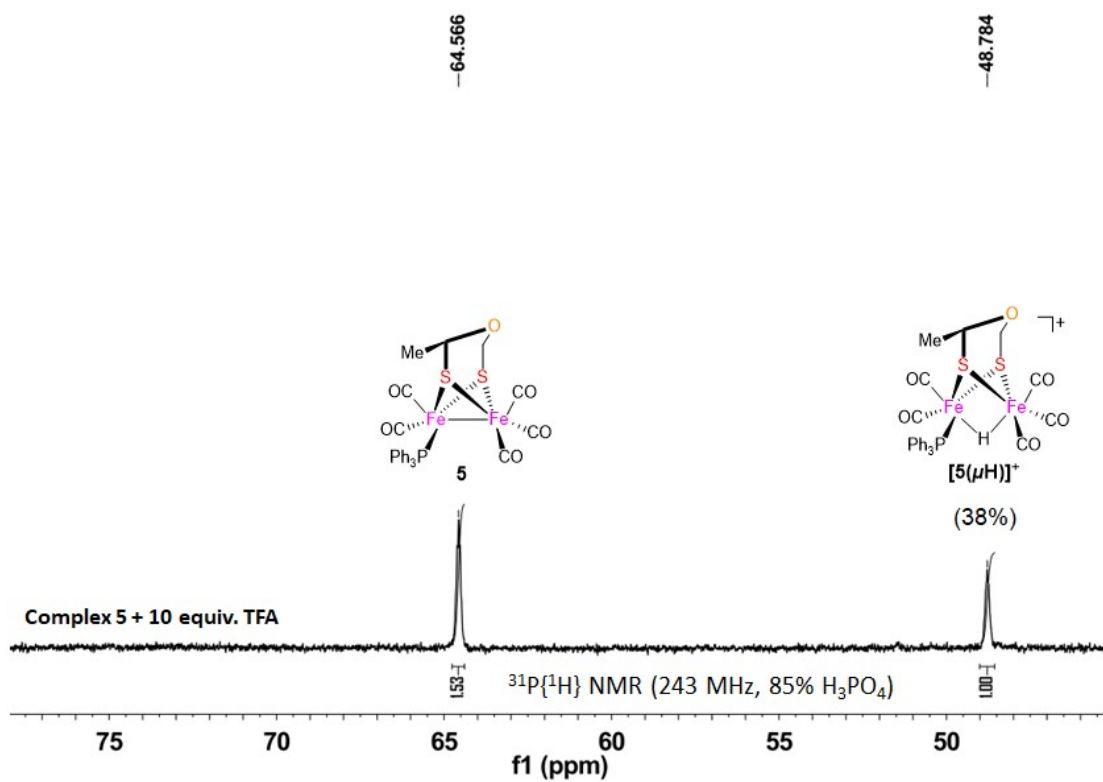

**Figure S3.**  $^{31}\text{P}\{^1\text{H}\}$  NMR spectrum of the monosubstituted complex **5** (0.015 mmol) with 10 equivalents of strong acid  $\text{CF}_3\text{CO}_2\text{H}$  (TFA) in  $\text{CDCl}_3$  (0.5 mL) at 298 K for 4 h. *Insert:* the proposed structure of the protonated species  $[\mathbf{5}(\mu\text{H})]^+$ .

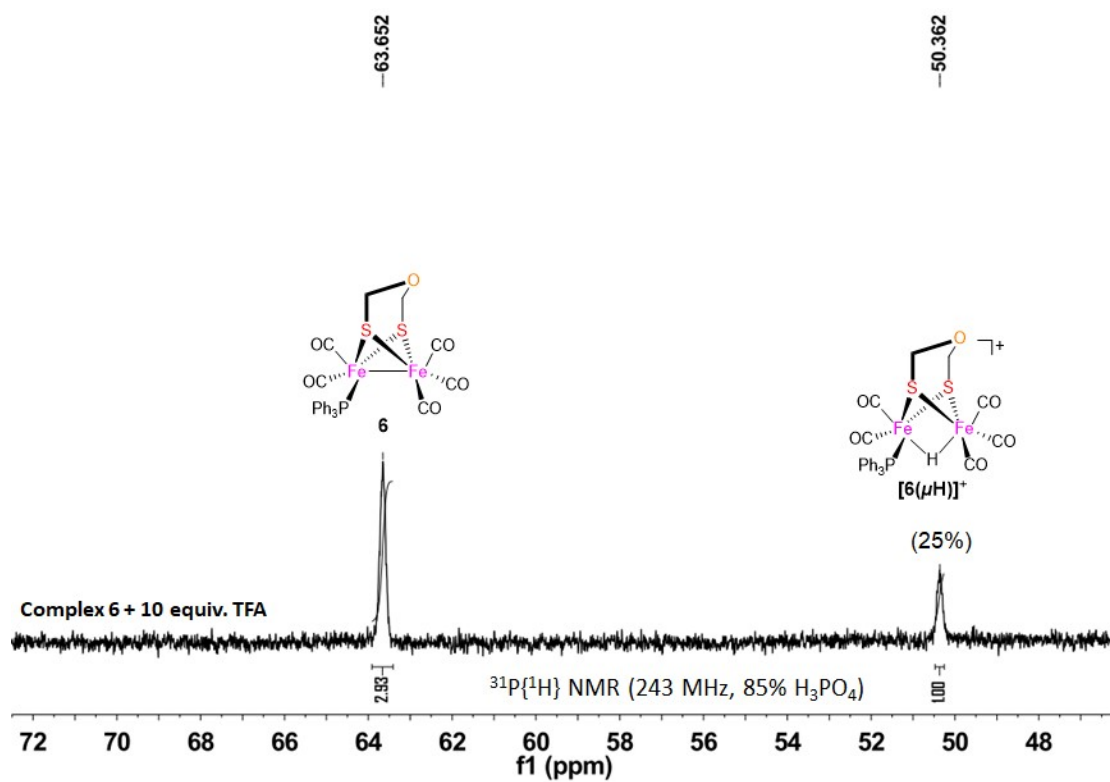

**Figure S4.**  $^{31}\text{P}\{^1\text{H}\}$  NMR spectrum of the monosubstituted complex **6** (0.015 mmol) with 10 equivalents of strong acid  $\text{CF}_3\text{CO}_2\text{H}$  (TFA) in  $\text{CDCl}_3$  (0.5 mL) at 298 K for 4 h. *Insert:* the proposed structure of the protonated species  $[\mathbf{6}(\mu\text{H})]^+$ .

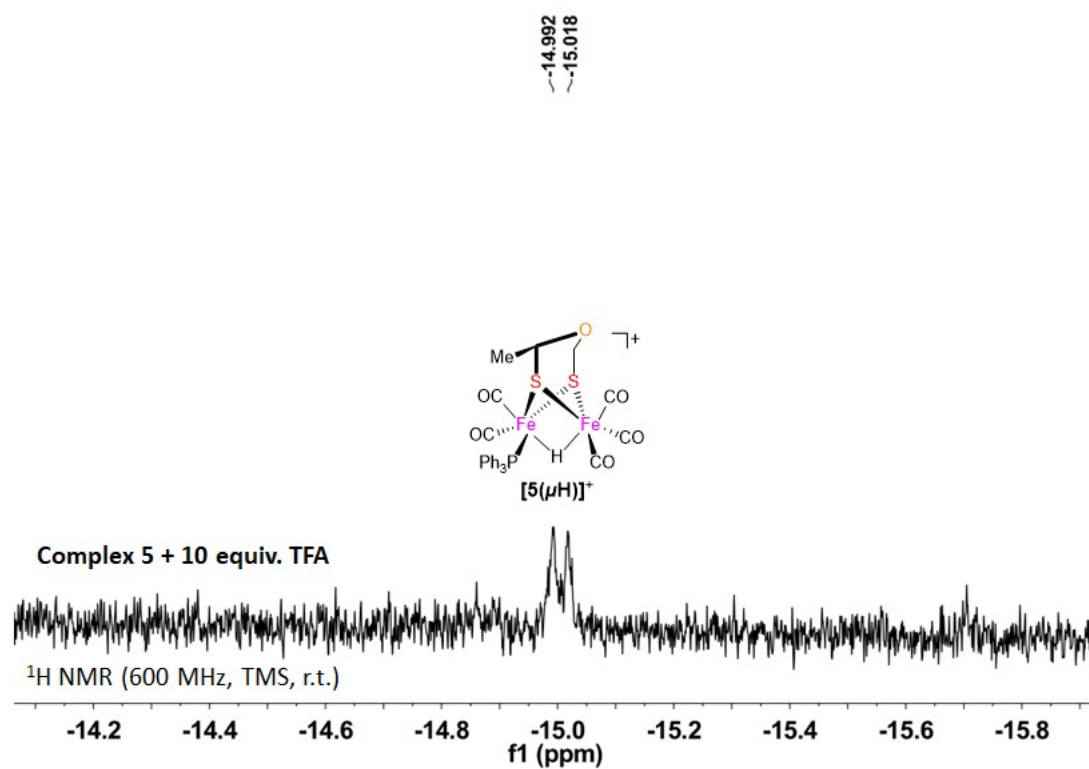

**Figure S5.** High-field region <sup>1</sup>H NMR spectrum of the monosubstituted complex **5** (0.015 mmol) with 10 equivalents of strong acid CF<sub>3</sub>CO<sub>2</sub>H (TFA) in CDCl<sub>3</sub> (0.5 mL) at 298 K for 4 h. *Insert:* the proposed structure of the protonated species [5( $\mu$ H)]<sup>2+</sup>.

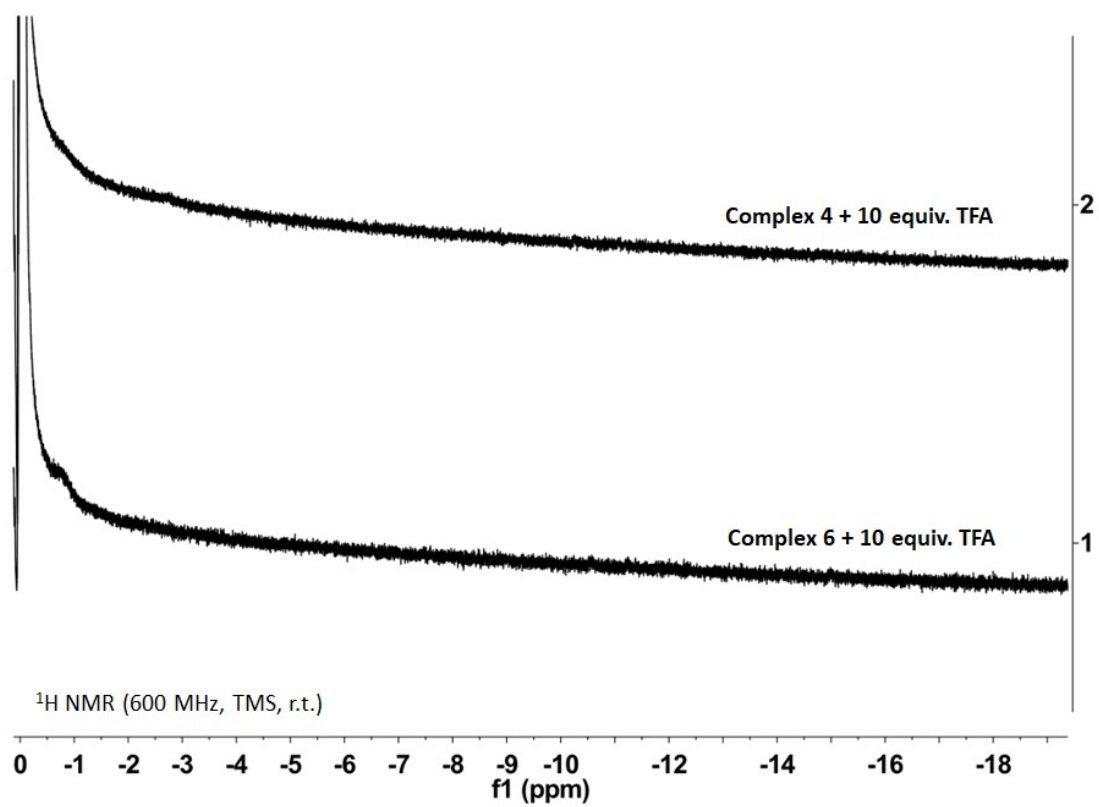

**Figure S6.** High-field region <sup>1</sup>H NMR spectra of the monosubstituted complexes **4** and **6** (0.015 mmol) with 10 equivalents of strong acid CF<sub>3</sub>CO<sub>2</sub>H (TFA) in CDCl<sub>3</sub> (0.5 mL) at 298 K for 4 h.

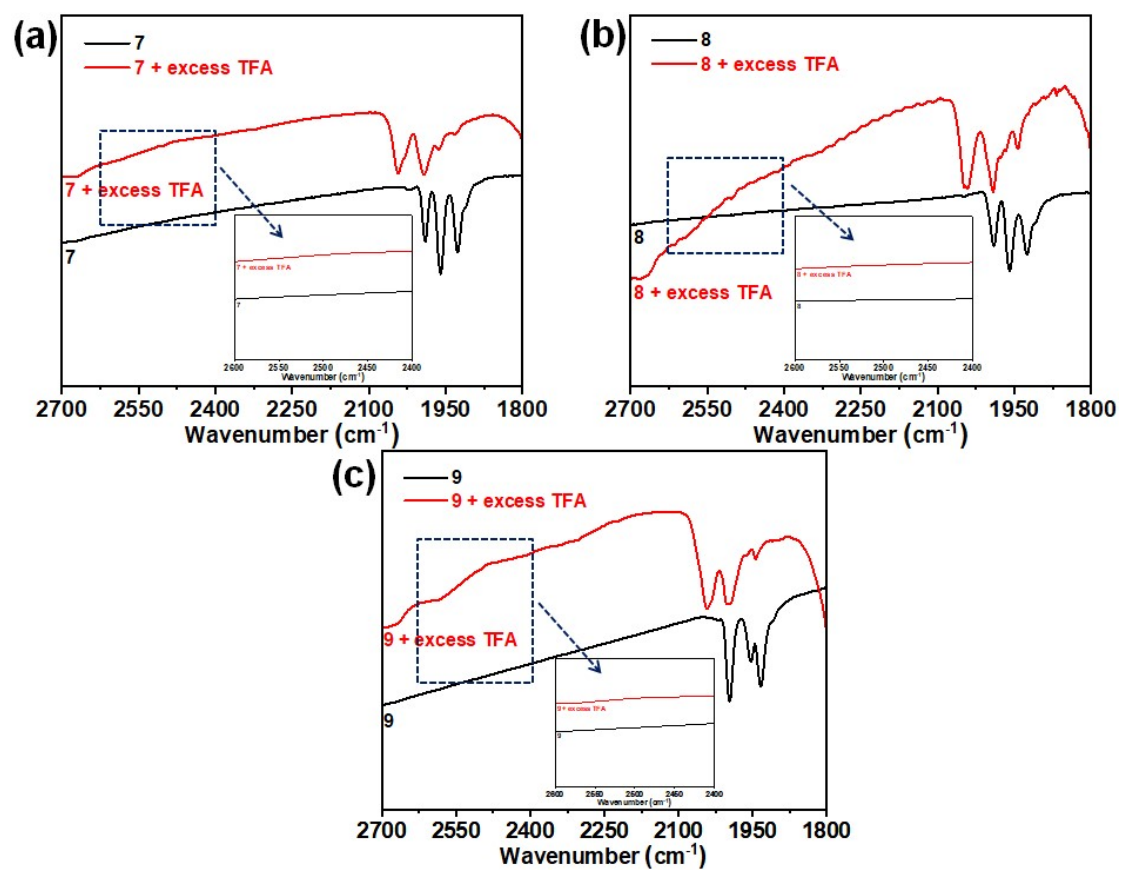

**Figure S7.** Comparison for FT-IR spectra (2700-1800 cm<sup>-1</sup>, KBr disk) of the disubstituted complexes **7** (a), **8** (b), and **9** (c) with 0 (black line) versus 10 (red line) equivalents of strong acid TFA. *Insert:* An enlarged FT-IR spectrum in the region of 2600-2400 cm<sup>-1</sup> in Figures S7a-7c.

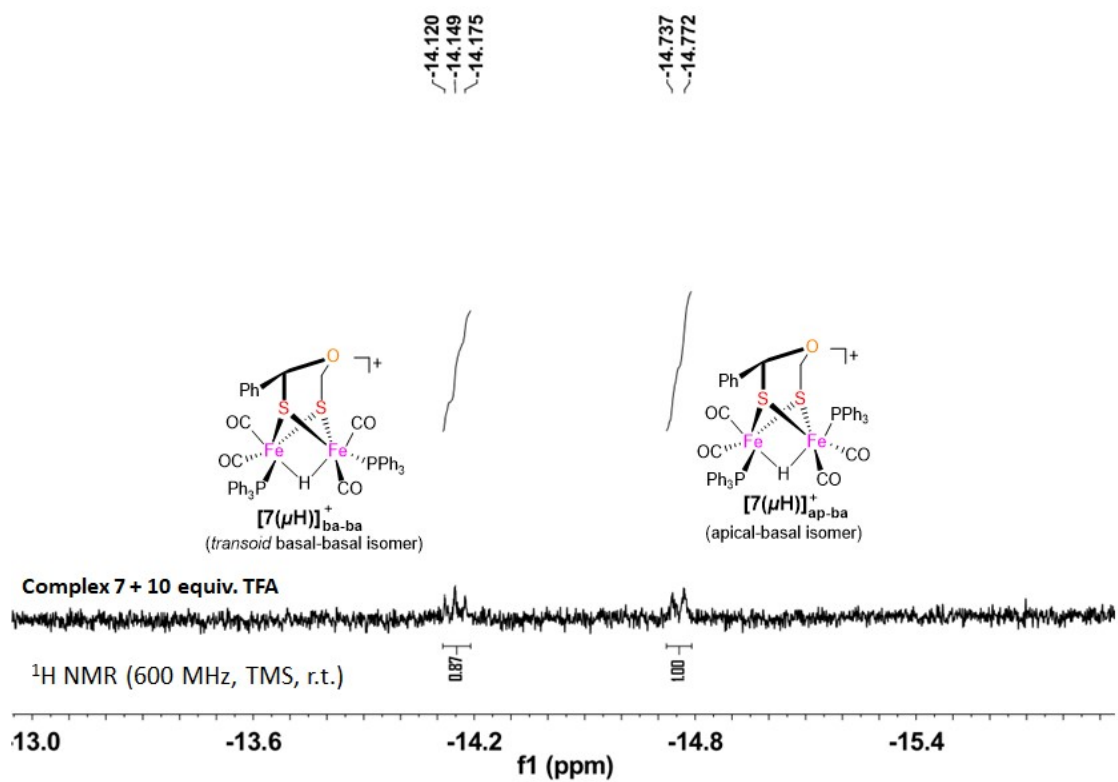

**Figure S8.** High-field region  $^1\text{H NMR}$  spectrum of the disubstituted complex **7** (0.015 mmol) with 10 equivalents of strong acid  $\text{CF}_3\text{CO}_2\text{H}$  (TFA) in  $\text{CDCl}_3$  (0.5 mL) at 298 K for 3 h. *Insert:* The proposed isomeric structures of the protonated species  $[7(\mu\text{H})]^+$ .

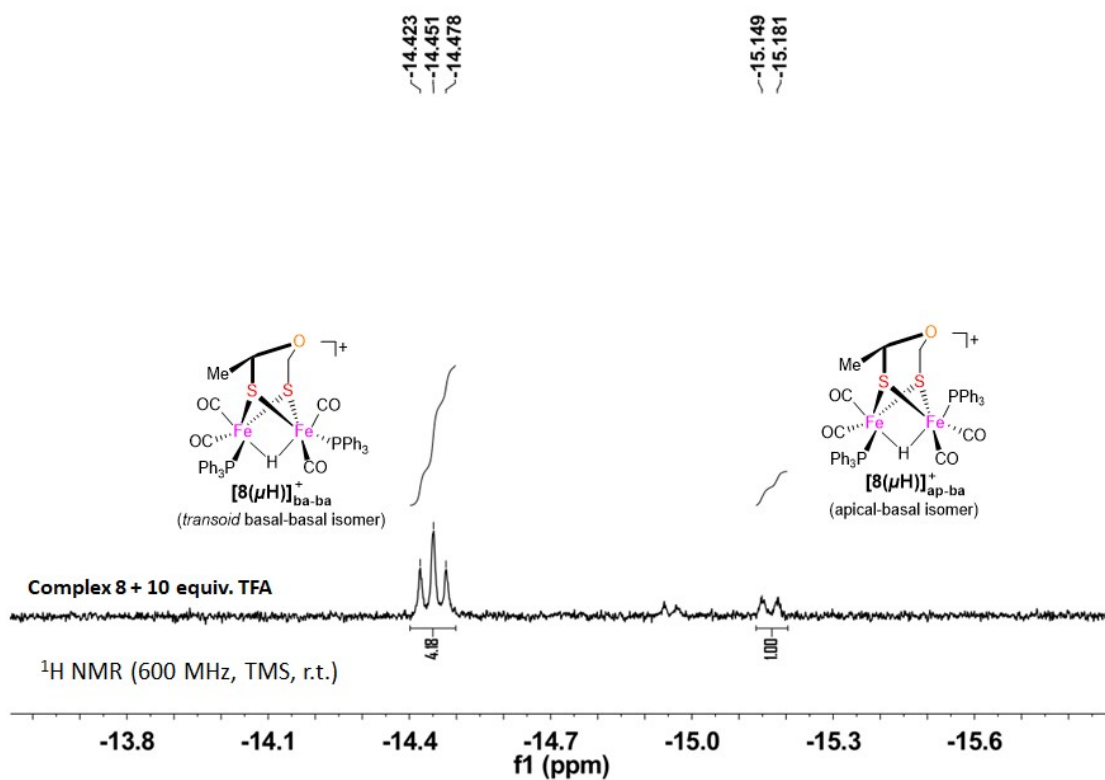

**Figure S9.** High-field region  $^1\text{H}$  NMR spectrum of the disubstituted complex **8** (0.015 mmol) with 10 equivalents of strong acid  $\text{CF}_3\text{CO}_2\text{H}$  (TFA) in  $\text{CDCl}_3$  (0.5 mL) at 298 K for 3 h. *Insert:* The proposed isomeric structures of the protonated species  $[\mathbf{8}(\mu\text{H})]^+$ .

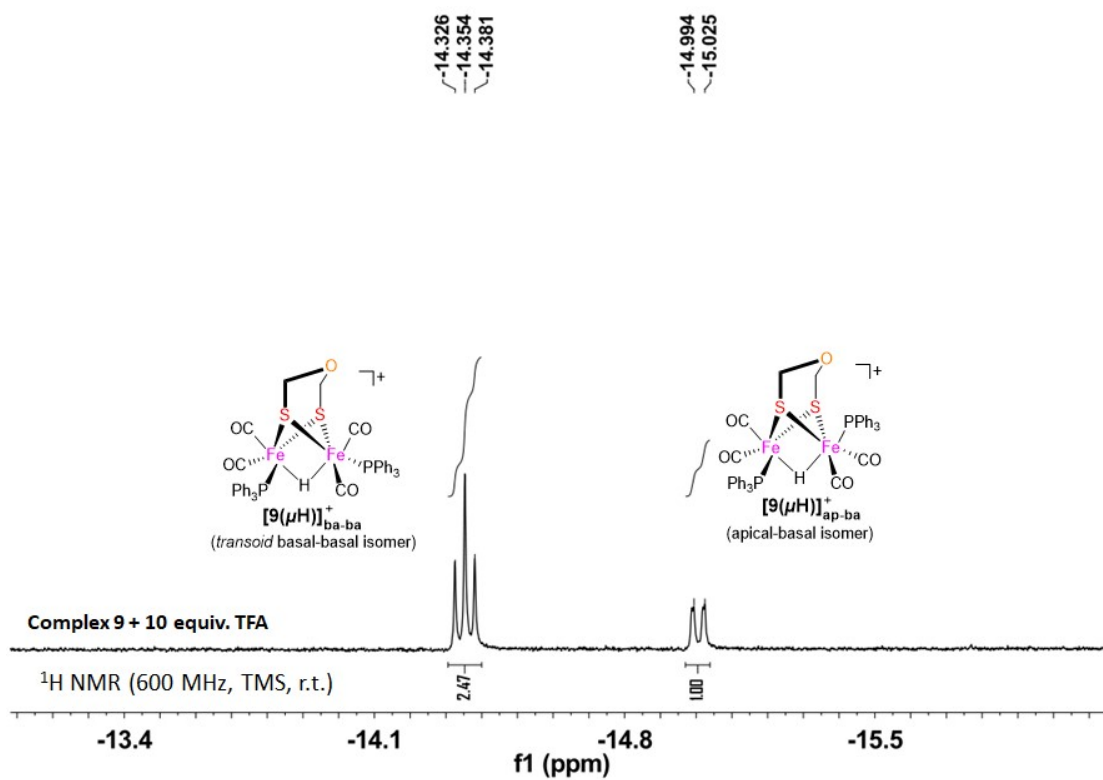

**Figure S10.** High-field region  $^1\text{H NMR}$  spectrum of the disubstituted complex **9** (0.015 mmol) with 10 equivalents of strong acid  $\text{CF}_3\text{CO}_2\text{H}$  (TFA) in  $\text{CDCl}_3$  (0.5 mL) at 298 K for 3 h. *Insert:* The proposed isomeric structures of the protonated species  $[9(\mu\text{H})]^+$ .



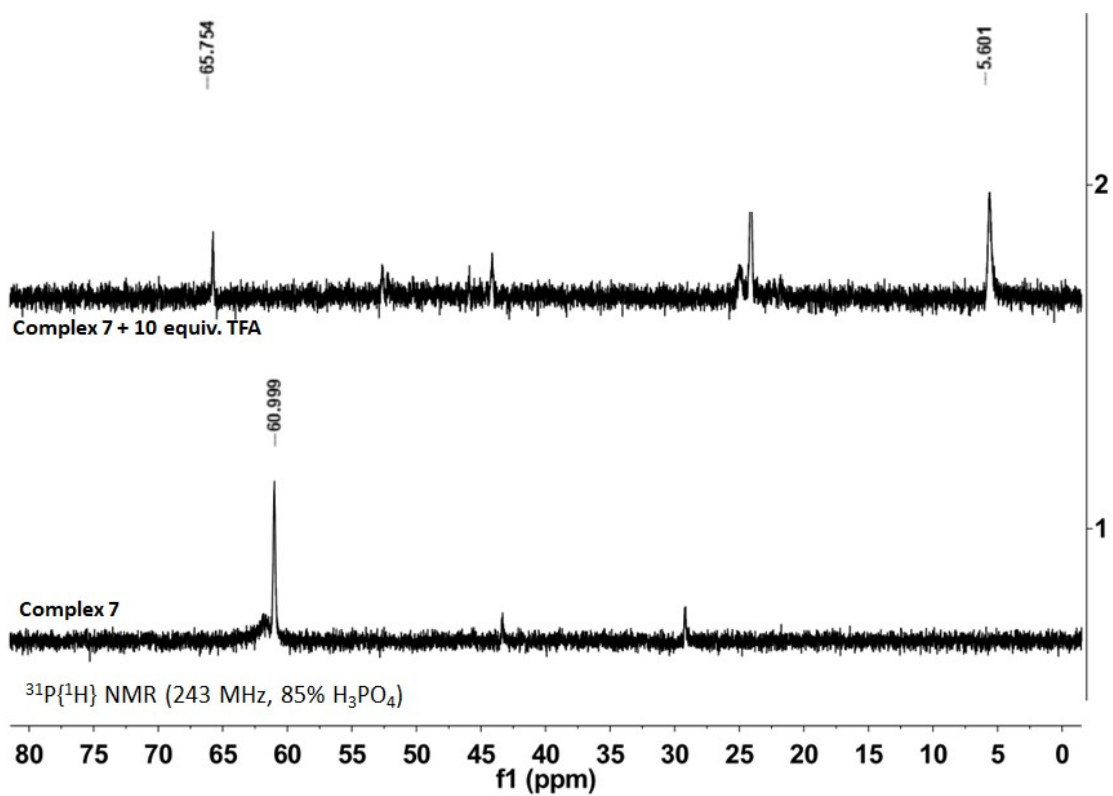

**Figure S11.**  $^{31}\text{P}\{^1\text{H}\}$  NMR spectra of the disubstituted complex **7** (0.015 mmol) with 0 versus 10 equivalents of strong acid  $\text{CF}_3\text{CO}_2\text{H}$  (TFA) in  $\text{CDCl}_3$  (0.5 mL) at 298 K for 3 h. *Insert:* The proposed isomeric structures of the protonated species  $[\mathbf{7}(\mu\text{H})]^+$ .

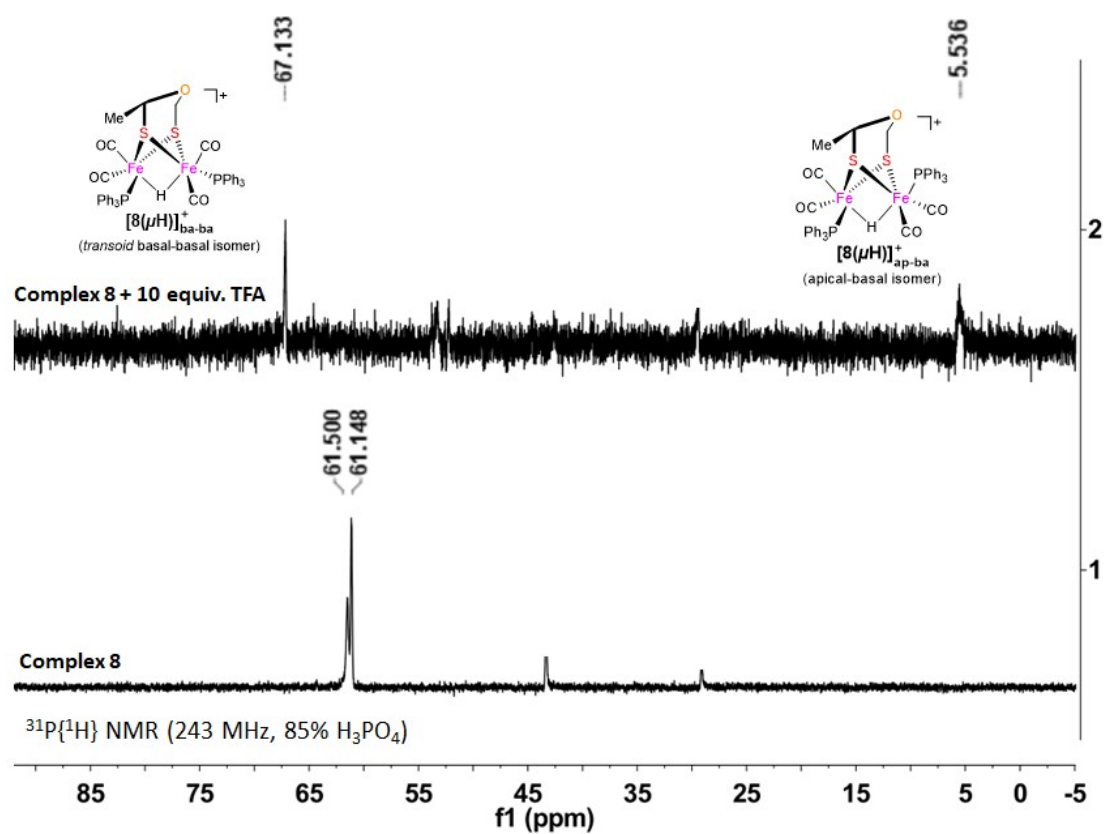

**Figure S12.**  $^{31}\text{P}\{^1\text{H}\}$  NMR spectra of the disubstituted complex **8** (0.015 mmol) with 0 versus 10 equivalents of strong acid  $\text{CF}_3\text{CO}_2\text{H}$  (TFA) in  $\text{CDCl}_3$  (0.5 mL) at 298 K for 3 h. *Insert:* The proposed isomeric structures of the protonated species  $[\mathbf{8}(\mu\text{H})]^+$ .

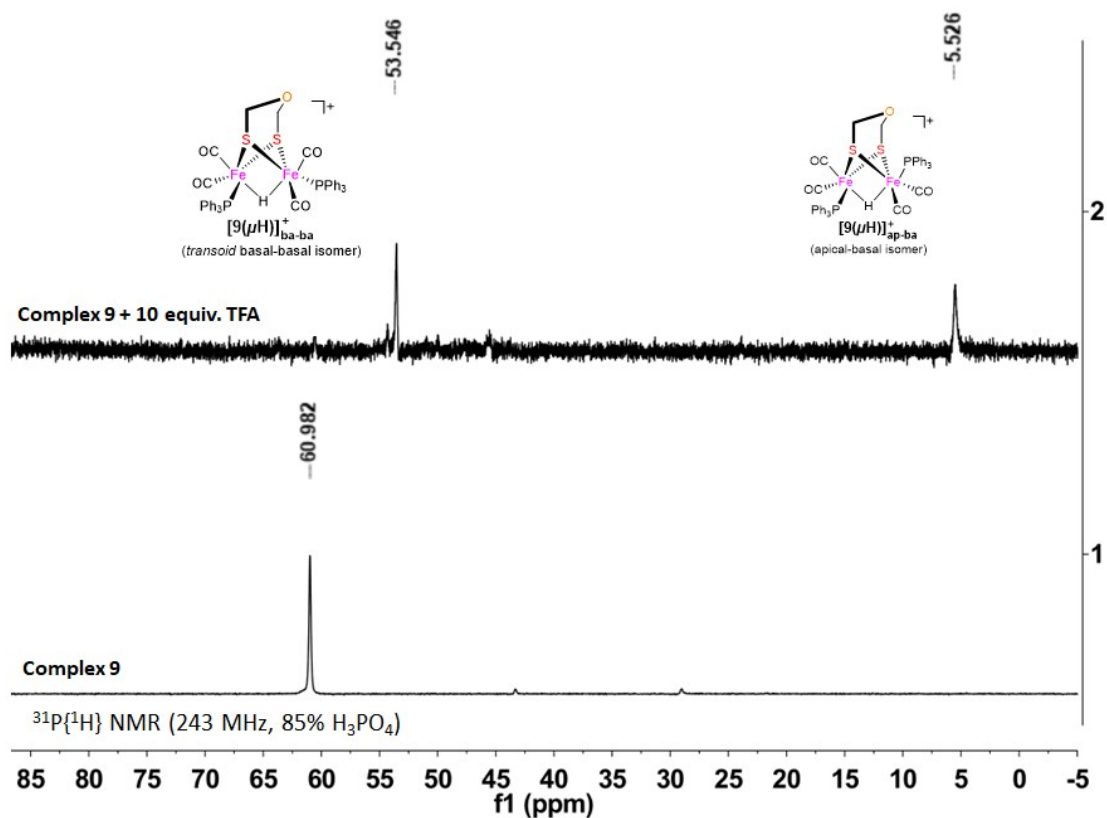

**Figure S13.**  $^{31}\text{P}\{^1\text{H}\}$  NMR spectra of the disubstituted complex **9** (0.015 mmol) with 0 versus 10 equivalents of strong acid  $\text{CF}_3\text{CO}_2\text{H}$  (TFA) in  $\text{CDCl}_3$  (0.5 mL) at 298 K for 3 h. *Insert:* The proposed isomeric structures of the protonated species  $[\mathbf{9}(\mu\text{H})]^+$ .

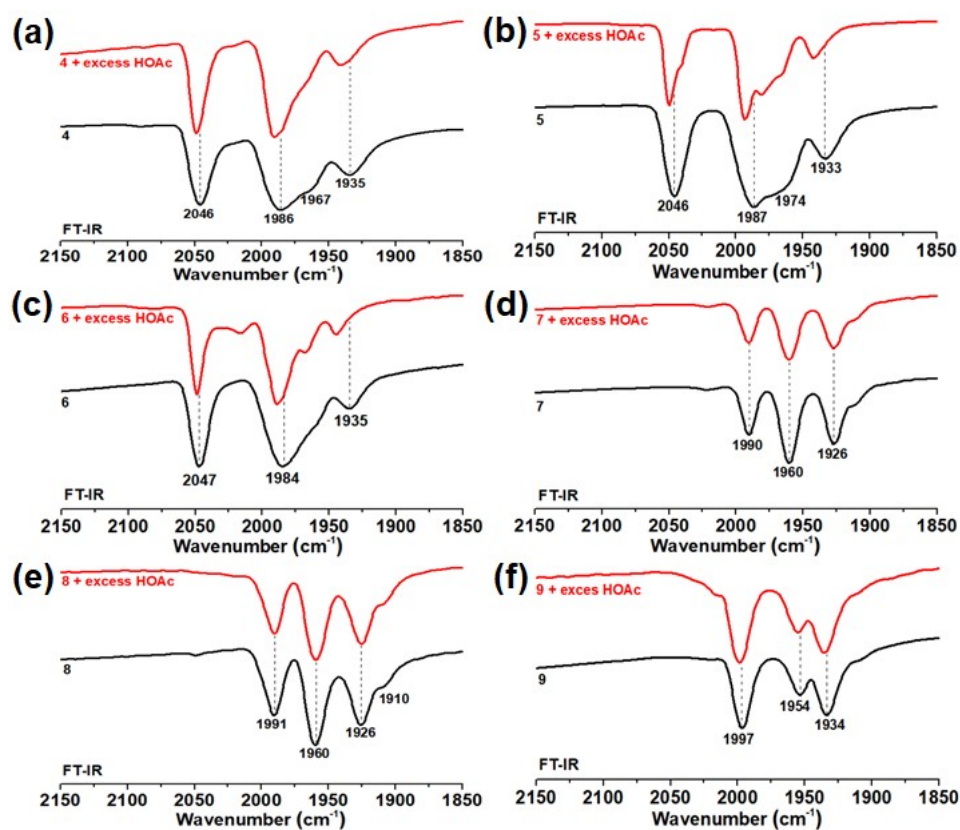

**Figure S14.** FT-IR spectra (a-f) recorded for the *in situ* protonations of the mono- and disubstituted complexes 4-6 and 7-9 (0.015 mmol) with 0 (black line) versus 10 (red line) equivalents of weak acid  $\text{CH}_3\text{CO}_2\text{H}$  (HOAc) in  $5\text{ mL CH}_2\text{Cl}_2$  at  $298\text{ K}$  for  $8\text{ h}$ , respectively.

**Part III. Electrolysis experiments and TONs calculations of complexes 4-6 and 7-**

9

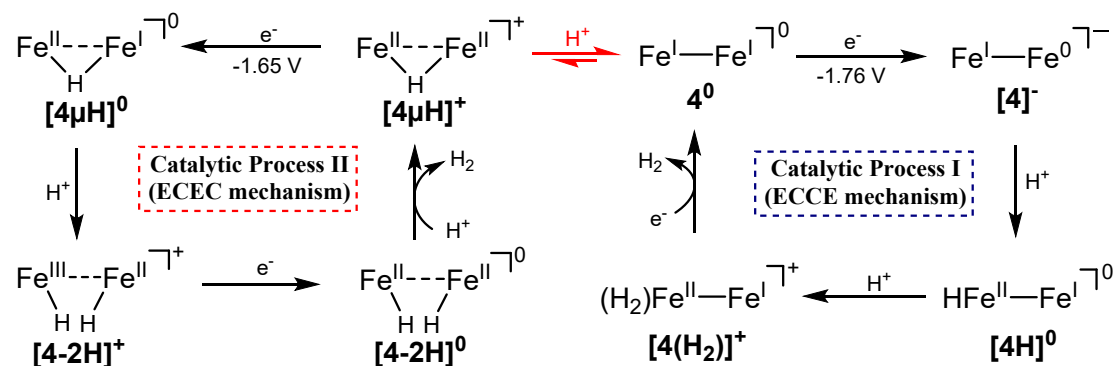

**Scheme S1.** Two electrocatalytic proton reduction processes I and II of a representative precursor **4** (for the monosubstituted complexes **4-6**) at  $E_{pc1} = -1.76$  V through a proposed ECCE mechanism and at  $E_{pc3} = -1.65$  V through a suggested ECEC mechanism in the presence of TFA as a proton source, respectively, wherein the Rodt, CO, and PPh<sub>3</sub> ligands are omitted for clarity.

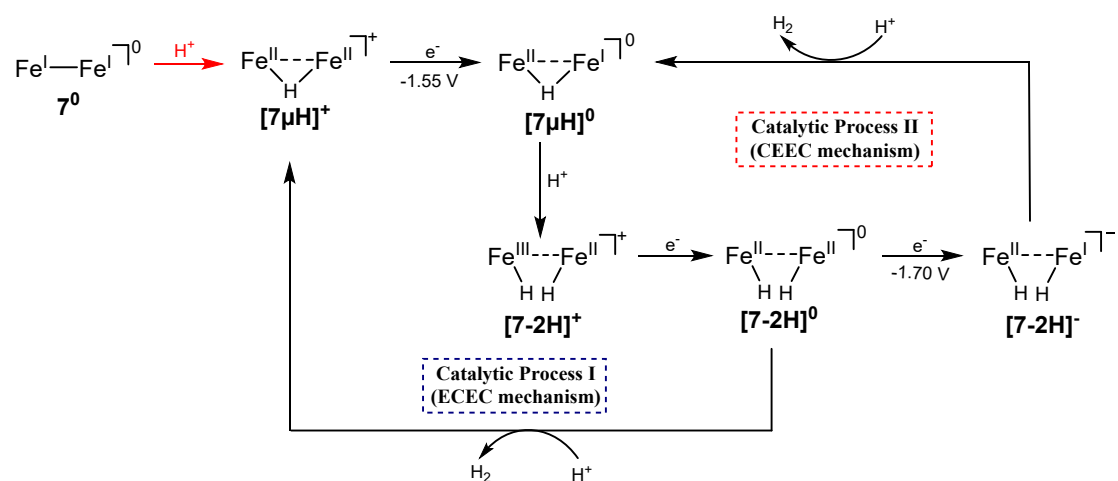

**Scheme S2.** Two electrocatalytic proton reduction processes I and II of a representative precursor **7** (for the disubstituted complexes **7-9**) at  $E_{pc3} = -1.55\text{ V}$  through a proposed ECEC mechanism and at  $E_{pc4} = -1.70\text{ V}$  through a suggested CEEC mechanism in the presence of TFA as a proton source, respectively, wherein the Rodt, CO, and PPh<sub>3</sub> ligands are omitted for clarity.

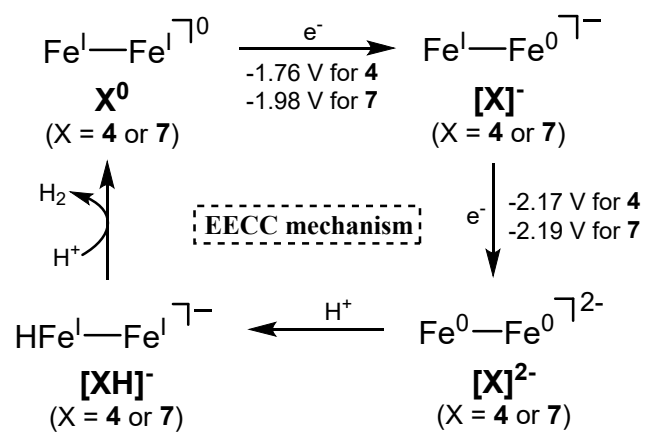

**Scheme S3.** Electrocatalytic proton reduction process of two representative precursors **4** (for the monosubstituted complexes **4-6**) at  $E_{pc2} = -2.17$  V and **7** (for the disubstituted complexes **7-9**) at  $E_{pc2} = -2.19$  V via a suggested EECC mechanism in the presence of HOAc as a proton source, respectively, wherein the Rodt, CO, and PPh<sub>3</sub> ligands are omitted for clarity.

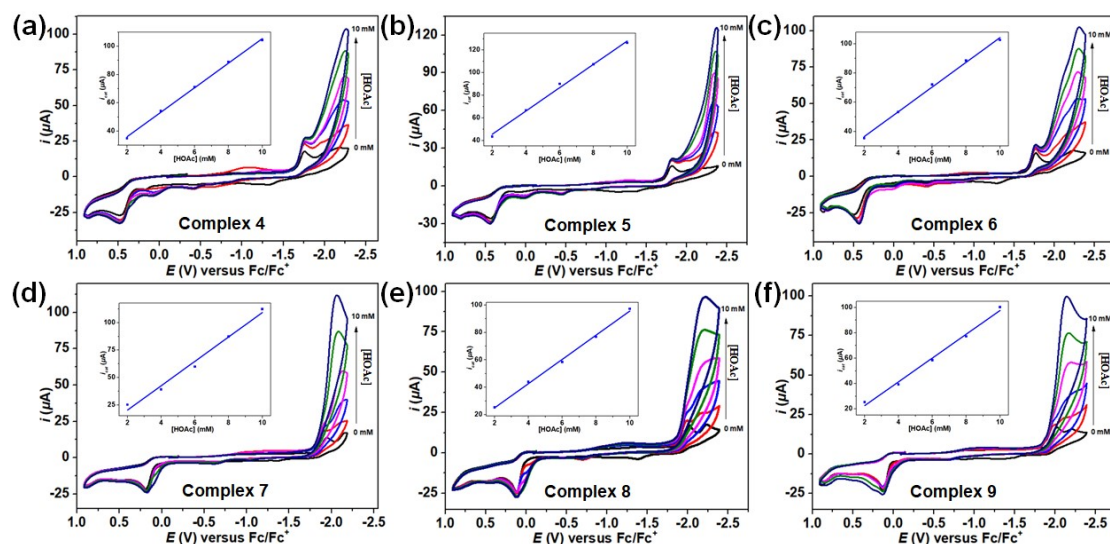

**Figure S15.** CV curves of 1.0 mM complexes **4-6** (a-c) and **7-9** (e-f) with weak acid HOAc (0–10 mM) in 0.1 M *n*-Bu<sub>4</sub>NPF<sub>6</sub>/MeCN at a scan rate of 0.05 V s<sup>-1</sup>. *Inserts* in (a-c) and (e-f): Plots of catalytic currents ( $i_{cat}$ ,  $\mu\text{A}$ ) of **4-6** and **7-9** with increasing acid concentrations ([HOAc], mM), respectively. All potentials are versus the ferrocene/ferrocenium (Fc<sup>0/+</sup>) couple.



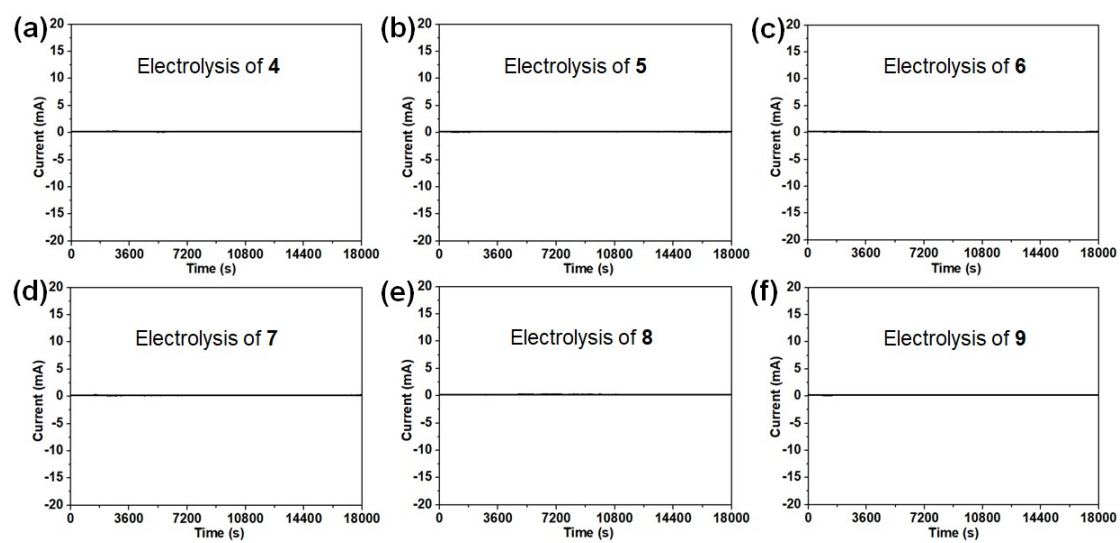

**Figure S16.** Controlled-potential electrolysis experiments (i-t curves) of complexes **4-6** (0.5 mM, a-c) and **7-9** (0.5 mM, d-f) in 5 mM strong acid TFA/MeCN solution for 5 h at -2.30 V vs. Ag/AgNO<sub>3</sub>.

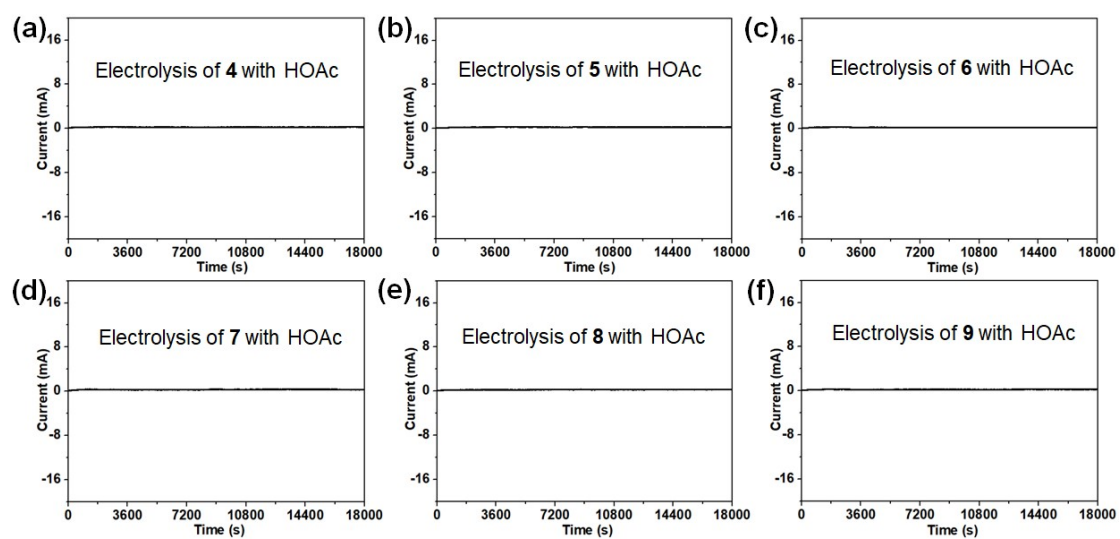

**Figure S17.** Controlled-potential electrolysis experiments (i-t curves) of complexes **4-6** (0.5 mM, a-c) and **7-9** (0.5 mM, d-f) in 5 mM weak acid HOAc/MeCN solution for 5 h at -2.30 V vs. Ag/AgNO<sub>3</sub>.

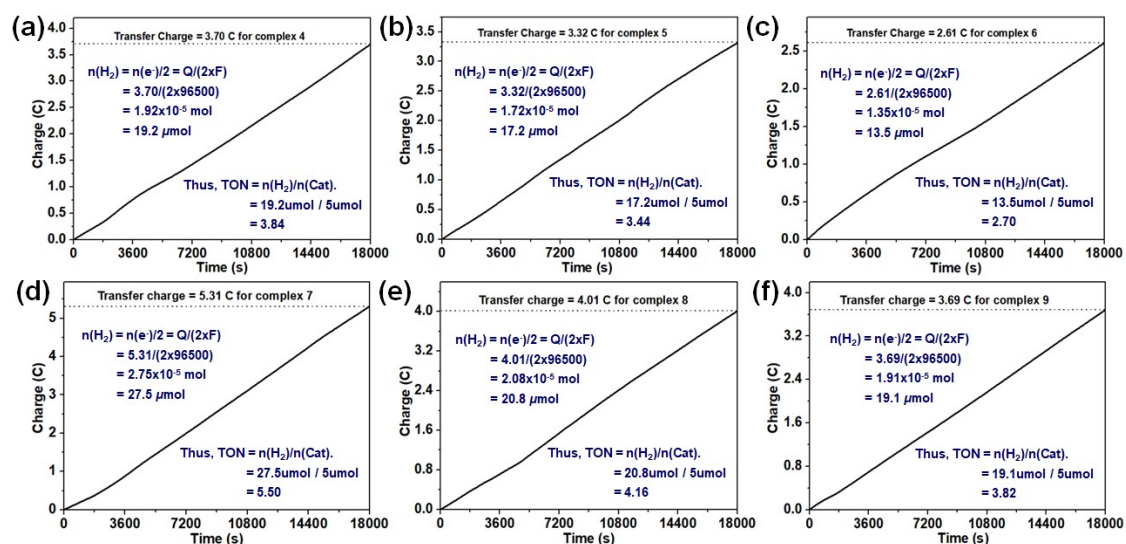

**Figure S18.** Q-t curves and TONs calculations of complexes 4-6 (0.5 mM, a-c) and 7-9 (0.5 mM, d-f) in 5 mM strong acid TFA/MeCN solution for 5 h at -2.30 V vs. Ag/AgNO<sub>3</sub>, respectively.

#### **TON calculation for complex 4 as a representative example [1,2]:**

- (1) From the CPE experiment shown in Fig. S15a, the total charges passed for complex 4 are equal to 3.70 C with 5 hours. Thus, we converted this charge into the moles of transfer electron on the GCE electrode (division by faraday constant F), *i.e.*,  $n(e^-) = Q/F$  ( $F = 96500 \text{ C} \cdot \text{mol}^{-1}$ ). According to the reaction  $2\text{H}^+ + 2e^- = \text{H}_2$ , the moles of H<sub>2</sub> produced is estimated from the moles of transfer electron on the GCE electrode (division by 2), *i.e.*,  $n(\text{H}_2) = n(e^-)/2 = Q/(2xF)$ . Thus,  $n(\text{H}_2) = 3.70 / (2 \times 96500) = 1.92 \times 10^{-5} \text{ mol} = 19.2 \mu\text{mol}$  for complex 4.
- (2) According to the equations:  $\text{TON} = n(\text{H}_2)/n(\text{catalyst})$ ,  $\text{TON} = 19.2 \mu\text{mol} / 5 \mu\text{mol} = 3.84$  for complex 4

#### **References:**

- [1] A. Le Goff, V. Artero, B. Jusselme, P. D. Tran, N. Guillet, R. Métyayé, A. Fihri, S. Palacin and M. Fontecave, From hydrogenases to noble metal-free catalytic nanomaterials for H<sub>2</sub> production and uptake, *Science*, 2009, **326**, 1384–1387.
- [2] S. Dey, A. Rana, S. G. Dey and A. Dey, Electrochemical hydrogen Production in acidic water by an azadithiolate bridged synthetic hydrogenase mimic: Role of aqueous solvation in lowering overpotential, *ACS Catal.*, 2013, **3**, 429–436.

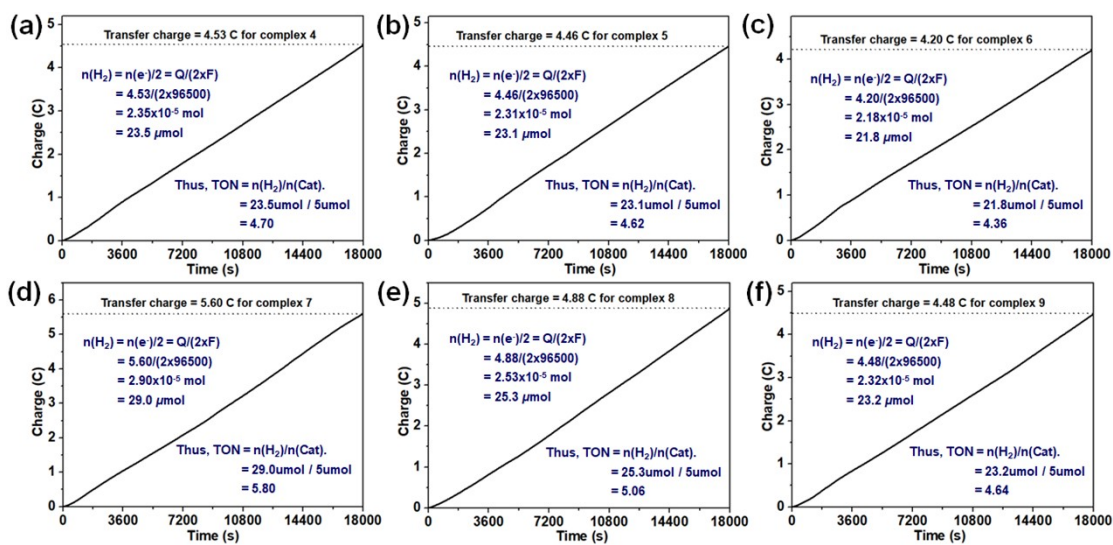

**Figure S19.** Q-t curves and TONs calculations of complexes **4-6** (0.5 mM, a-c) and **7-9** (0.5 mM, d-f) in 5 mM weak acid HOAc/MeCN solution for 5 h at -2.30 V vs. Ag/AgNO<sub>3</sub>, respectively.

**Part IV. The IR and NMR spectra for complexes 1, 2, 4-6 and 7-9**

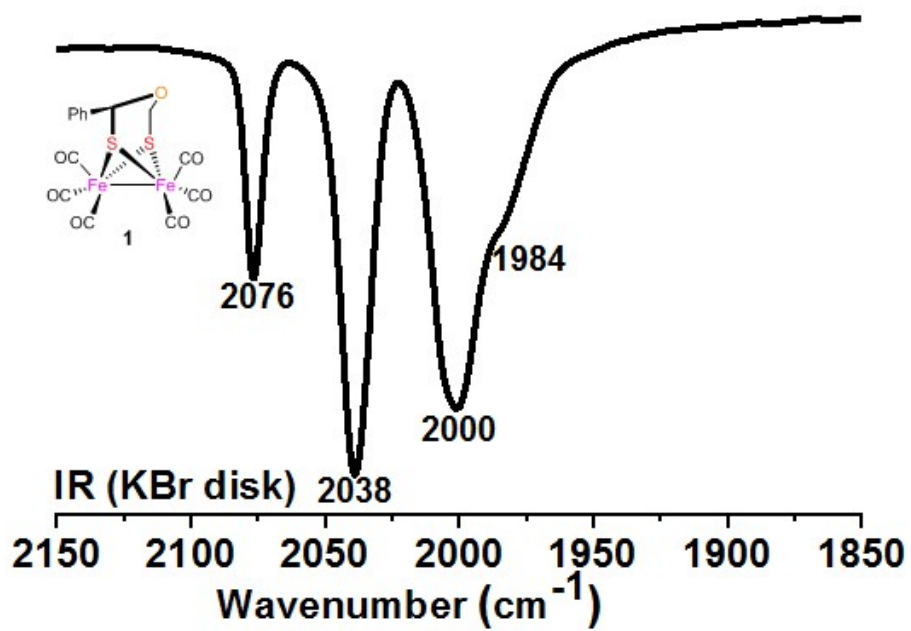

**Figure S20.** FT-IR spectrum of  $\text{Fe}_2(\mu\text{-Phodt})(\text{CO})_6$  (1) in KBr.

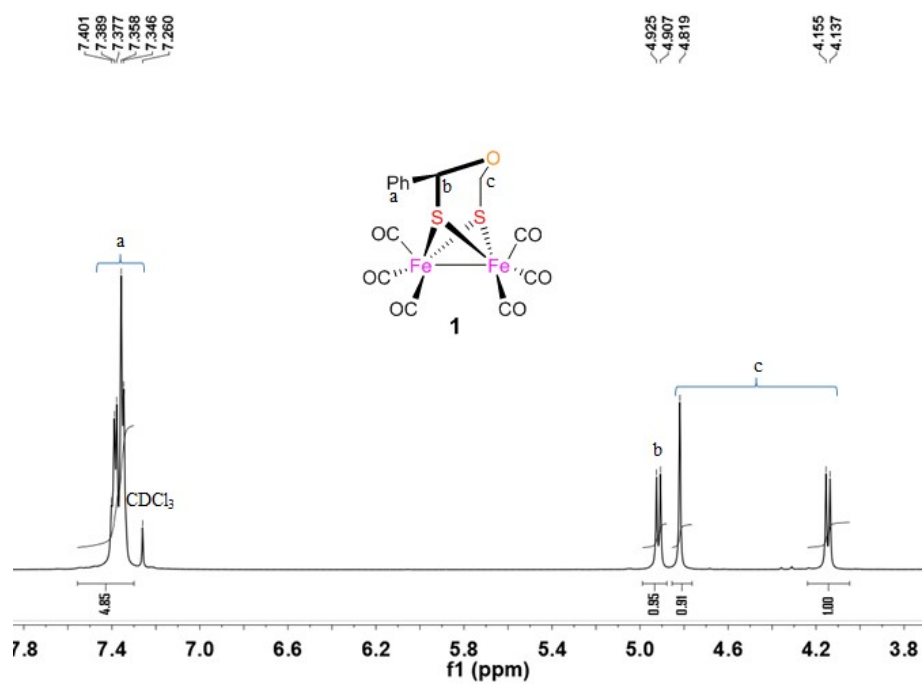

**Figure S21.**  $^1\text{H}$  NMR spectrum of  $\text{Fe}_2(\mu\text{-Phodt})(\text{CO})_6$  (1) in  $\text{CDCl}_3$  (600 MHz, TMS).

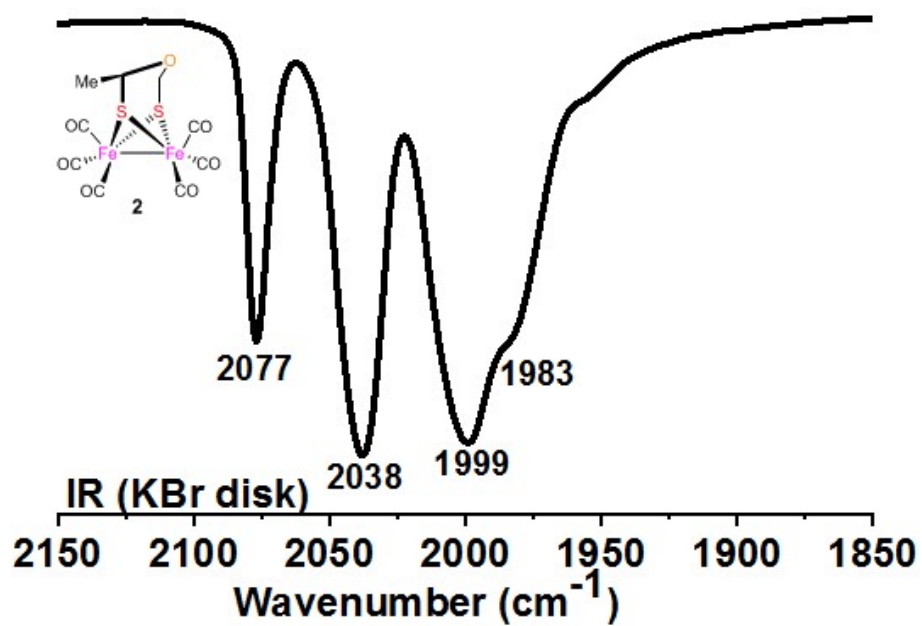

Figure S22. FT-IR spectrum of  $\text{Fe}_2(\mu\text{-Meodt})(\text{CO})_6$  (2) in KBr.

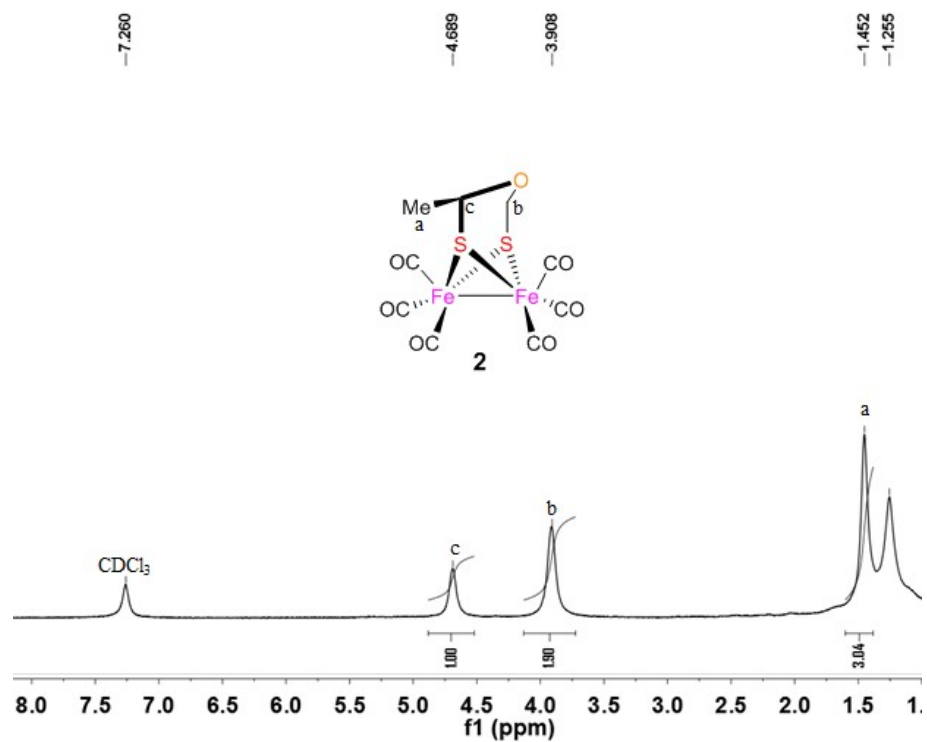

**Figure S23.**  $^1\text{H}$  NMR spectrum of  $\text{Fe}_2(\mu\text{-Meodt})(\text{CO})_6$  (**2**) in  $\text{CDCl}_3$  (600 MHz, TMS).



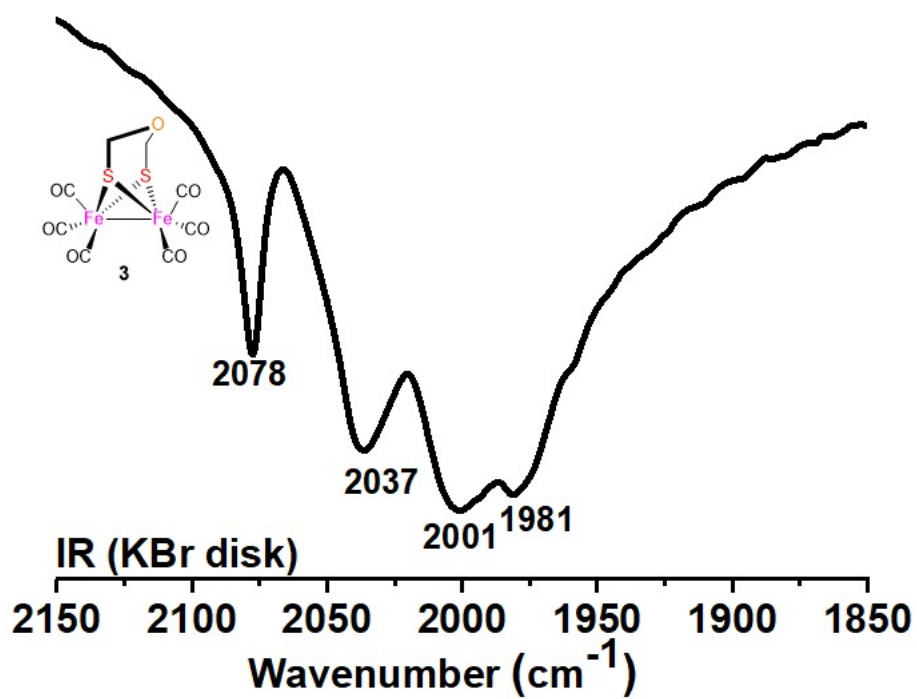

**Figure S24.** FT-IR spectrum of  $\text{Fe}_2(\mu\text{-odt})(\text{CO})_6$  (**3**) in KBr.

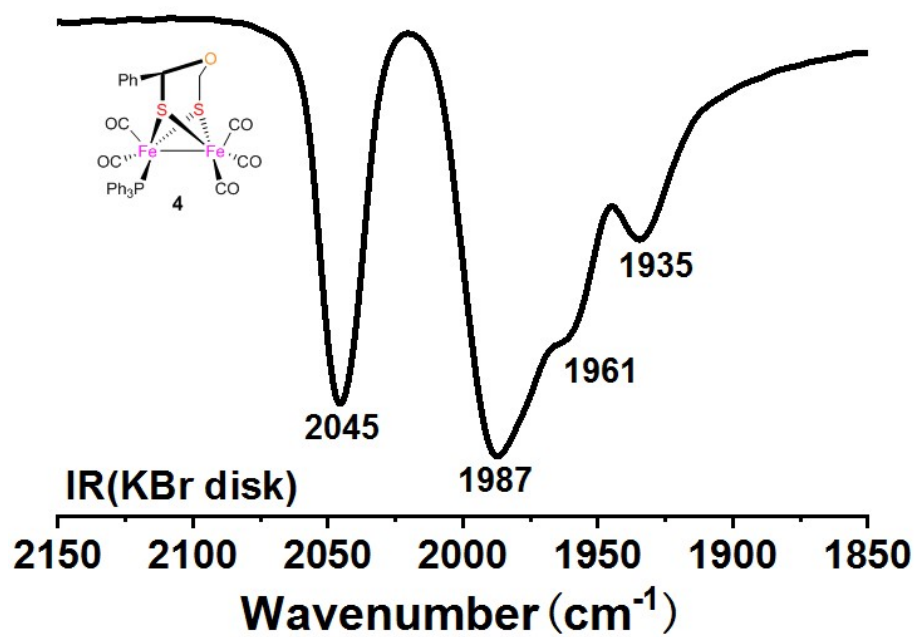

**Figure S25.** FT-IR spectrum of  $\text{Fe}_2(\mu\text{-Phodt})(\text{CO})_5(\text{PPh}_3)$  (4) in KBr.

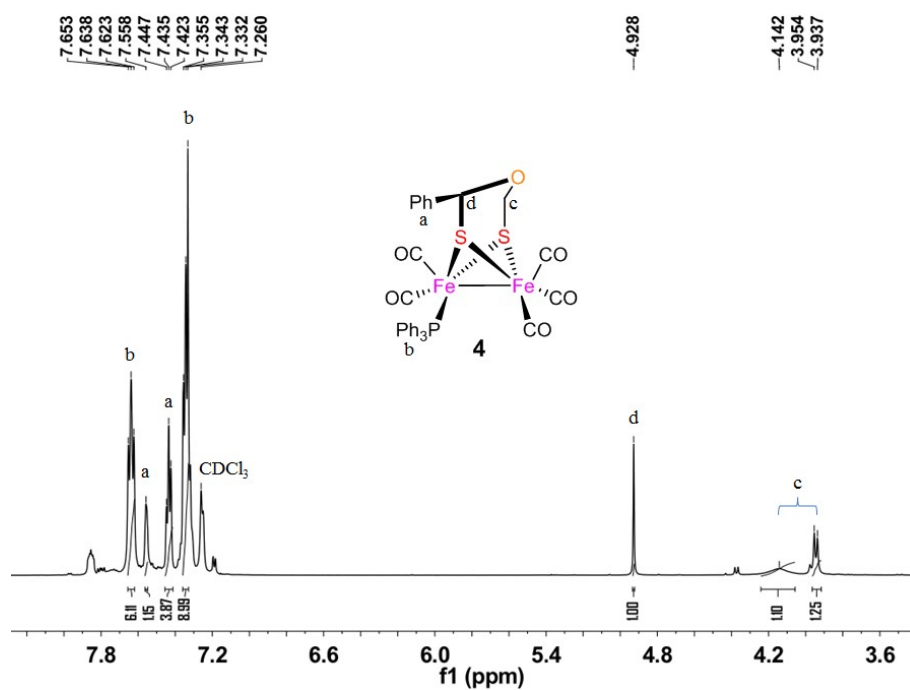

**Figure S26.** <sup>1</sup>H NMR spectrum of  $\text{Fe}_2(\mu\text{-Phodt})(\text{CO})_5(\text{PPh}_3)$  (**4**) in  $\text{CDCl}_3$  (600 MHz, TMS).

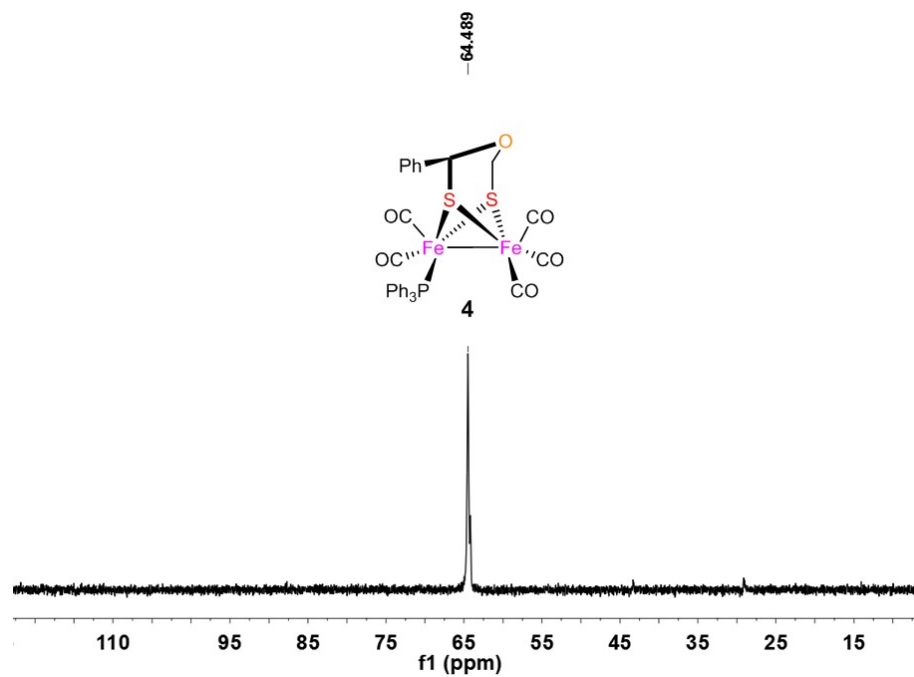

**Figure S27.**  $^{31}\text{P}\{^1\text{H}\}$  NMR spectrum of  $\text{Fe}_2(\mu\text{-Phodt})(\text{CO})_5(\text{PPh}_3)$  (**4**) in  $\text{CDCl}_3$  (243 MHz, 85%  $\text{H}_3\text{PO}_4$ ).

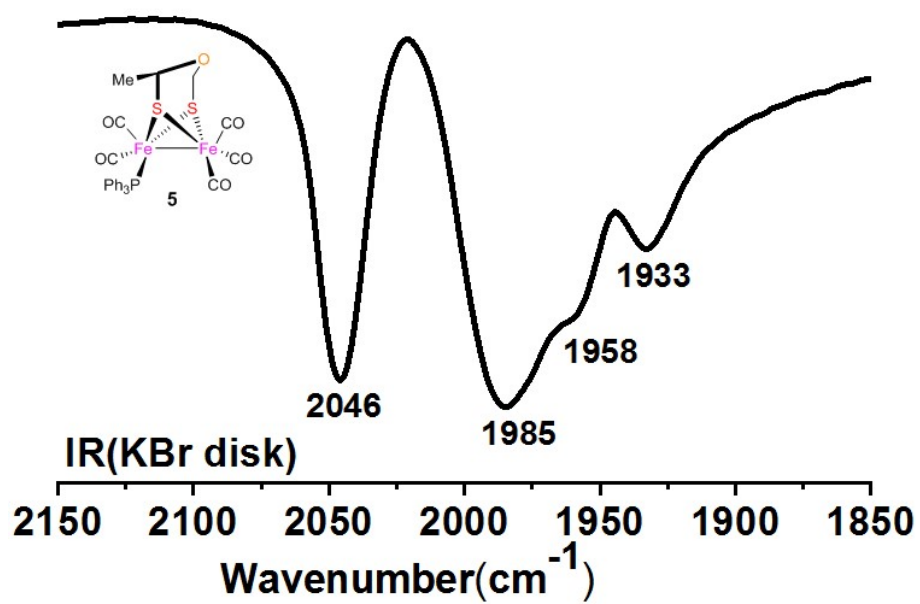

**Figure S28.** FT-IR spectrum of  $\text{Fe}_2(\mu\text{-Meodt})(\text{CO})_5(\text{PPh}_3)$  (5) in KBr.

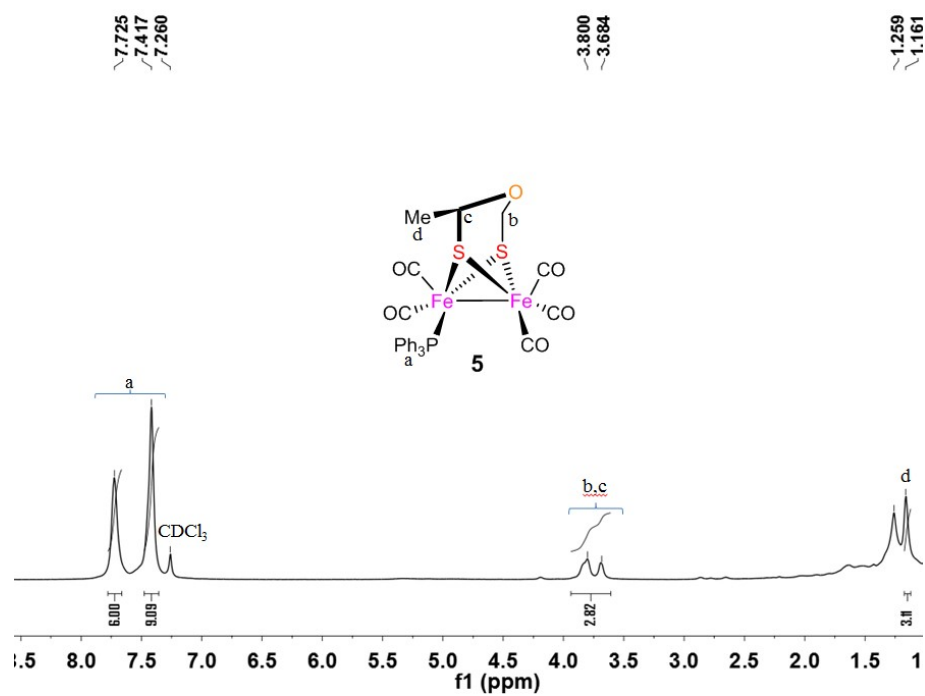

**Figure S29.**  $^1\text{H}$  NMR spectrum of  $\text{Fe}_2(\mu\text{-Meodt})(\text{CO})_5(\text{PPh}_3)$  (**5**) in  $\text{CDCl}_3$  (600 MHz, TMS).

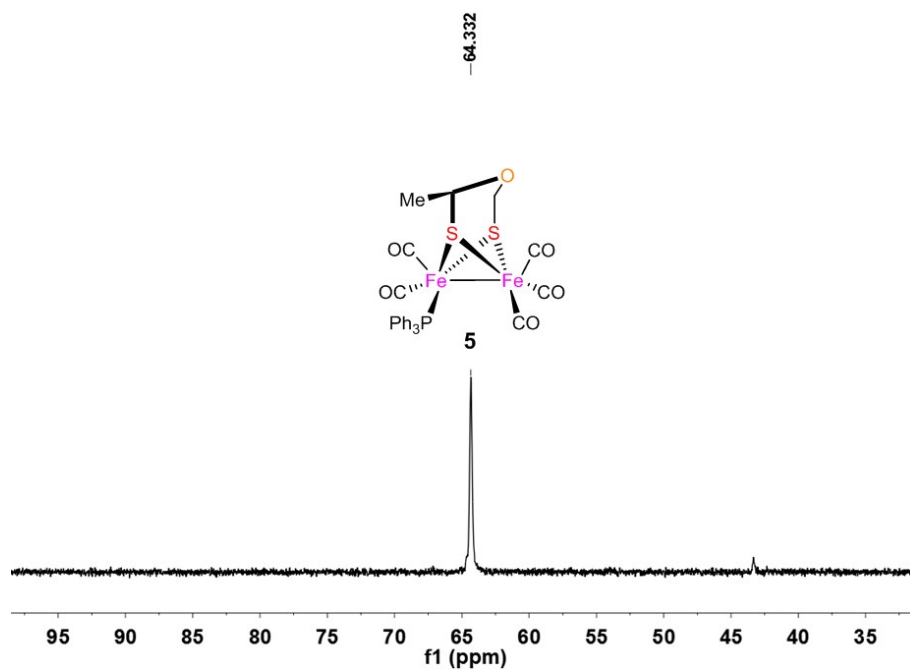

**Figure S30.**  $^{31}\text{P}\{^1\text{H}\}$  NMR spectrum of  $\text{Fe}_2(\mu\text{-Meodt})(\text{CO})_5(\text{PPh}_3)$  (**5**) in  $\text{CDCl}_3$  (243 MHz, 85%  $\text{H}_3\text{PO}_4$ ).

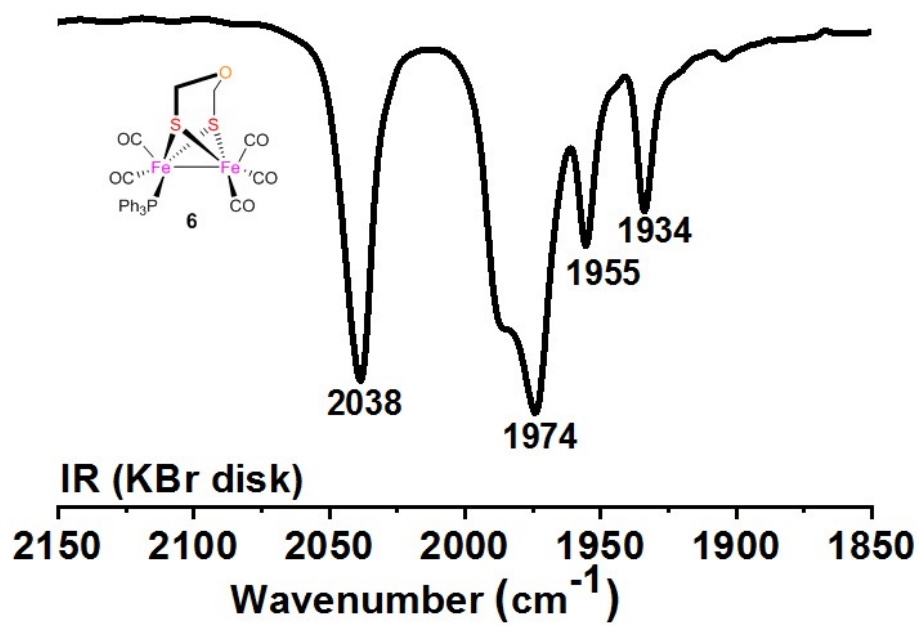

**Figure S31.** FT-IR spectrum of  $\text{Fe}_2(\mu\text{-odt})(\text{CO})_5(\text{PPh}_3)$  (6) in KBr.



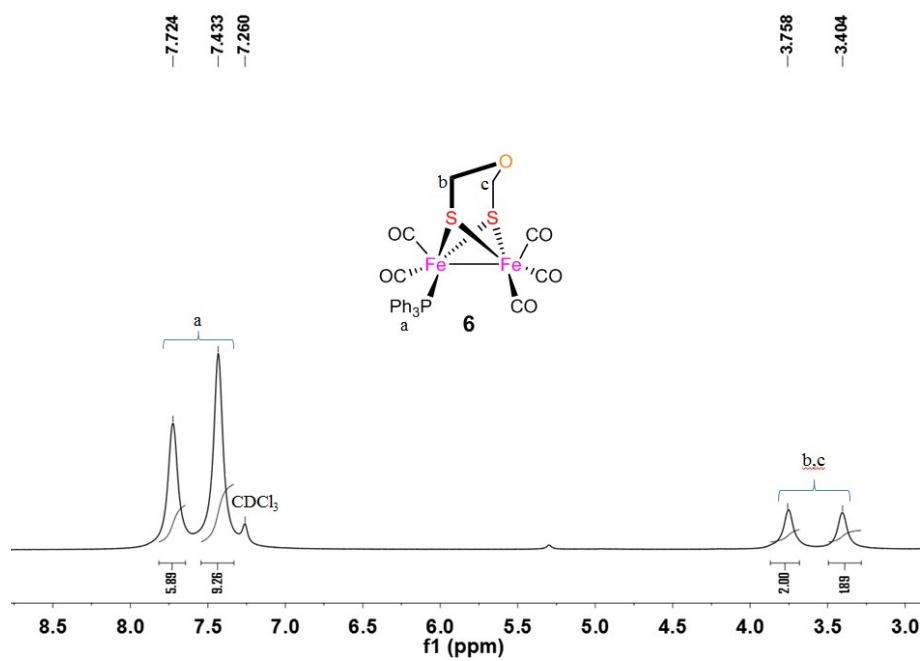

**Figure S32.**  $^1\text{H}$  NMR spectrum of  $\text{Fe}_2(\mu\text{-odt})(\text{CO})_5(\text{PPh}_3)$  (**6**) in  $\text{CDCl}_3$  (600 MHz, TMS).

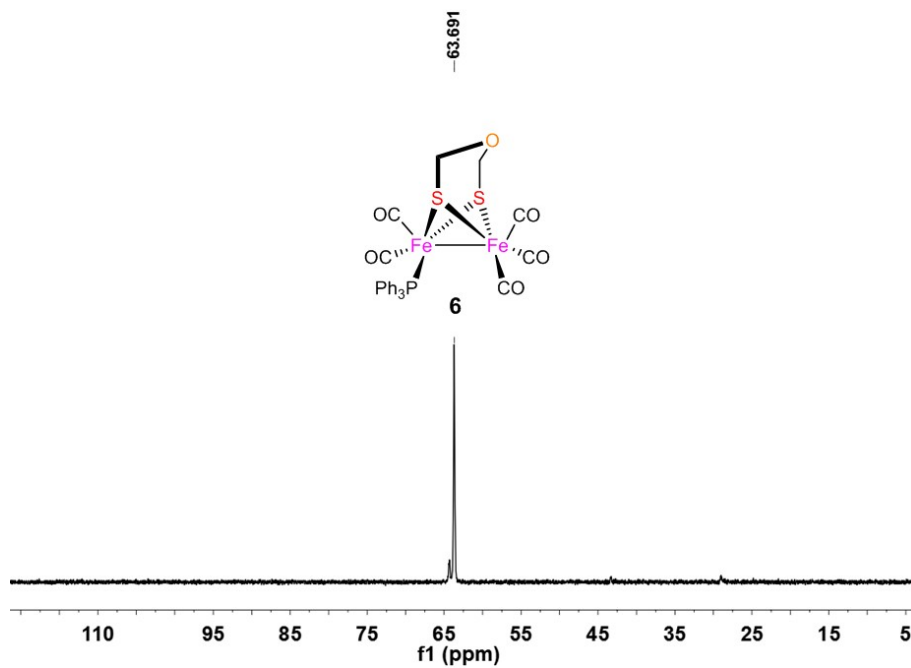

**Figure S33.**  $^{31}\text{P}\{^1\text{H}\}$  NMR spectrum of  $\text{Fe}_2(\mu\text{-odt})(\text{CO})_5(\text{PPh}_3)$  (**6**) in  $\text{CDCl}_3$  (243 MHz, 85%  $\text{H}_3\text{PO}_4$ ).

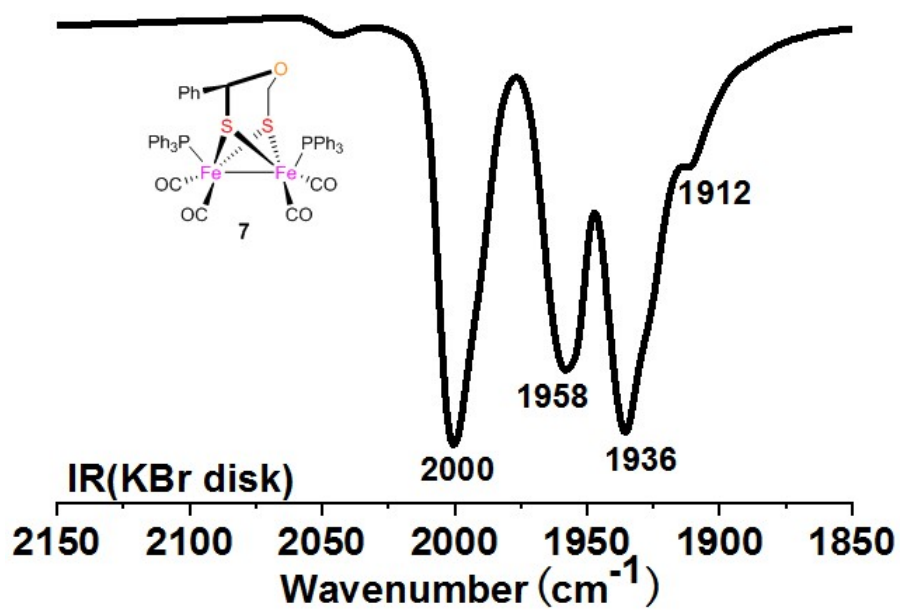

**Figure S34.** FT-IR spectrum of  $\text{Fe}_2(\mu\text{-Phodt})(\text{CO})_4(\text{PPh}_3)_2$  (7) in KBr.

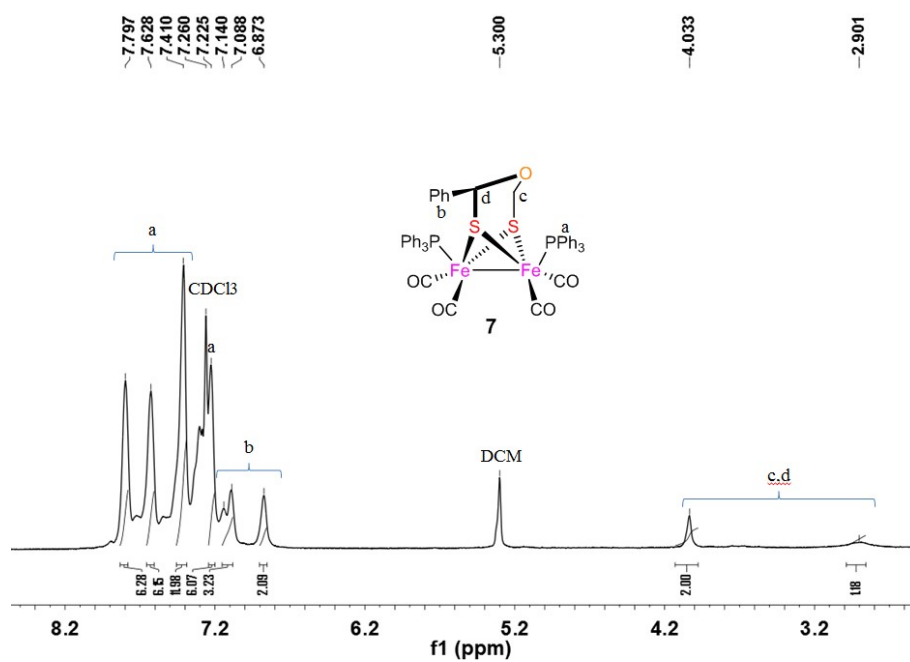

**Figure S35.**  $^1\text{H}$  NMR spectrum of  $\text{Fe}_2(\mu\text{-Phodt})(\text{CO})_4(\text{PPh}_3)_2$  (7) in  $\text{CDCl}_3$  (600 MHz, TMS)

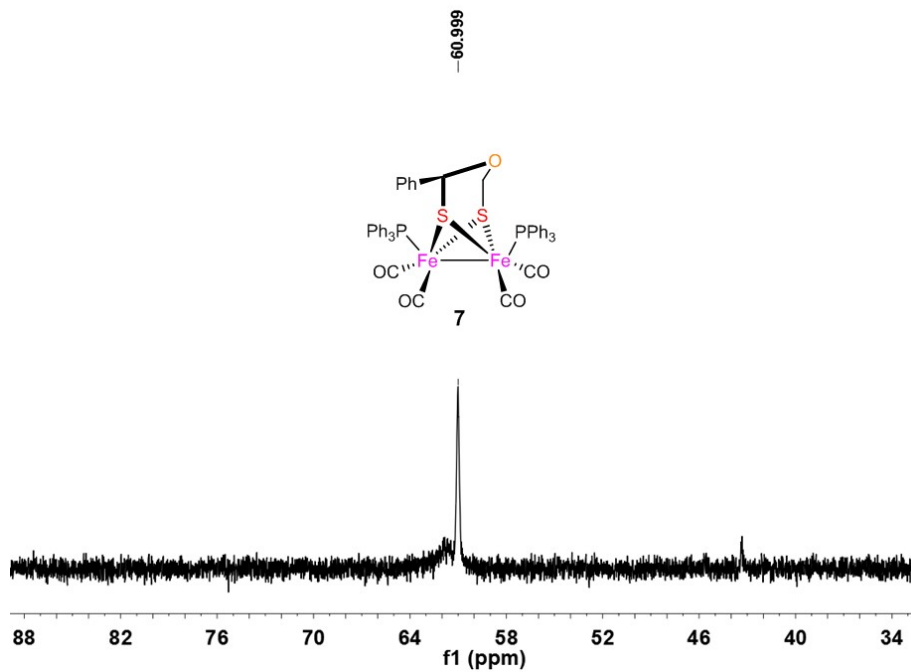

**Figure S36.**  $^{31}\text{P}\{^1\text{H}\}$  NMR spectrum of  $\text{Fe}_2(\mu\text{-Phodt})(\text{CO})_4(\text{PPh}_3)_2$  (**7**) in  $\text{CDCl}_3$  (243 MHz, 85%  $\text{H}_3\text{PO}_4$ ).

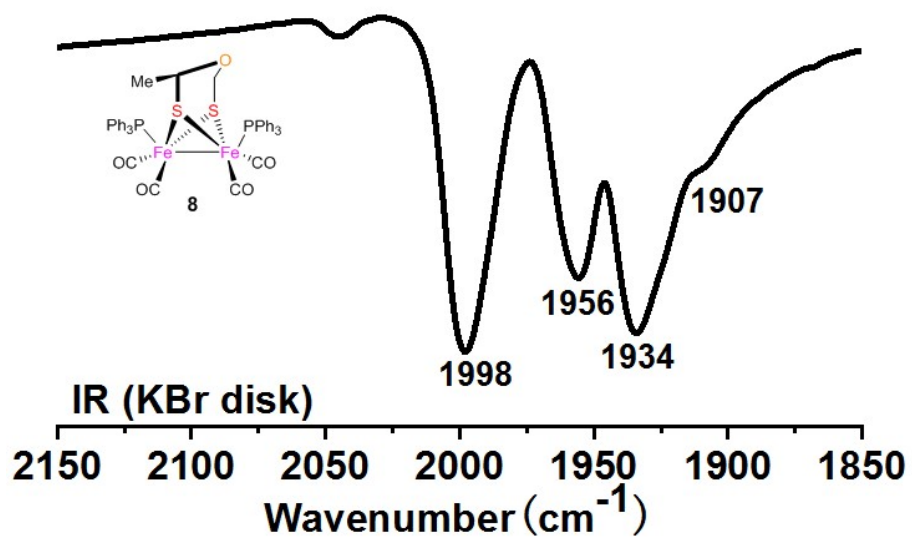

Figure S37. FT-IR spectrum of  $\text{Fe}_2(\mu\text{-Meodt})(\text{CO})_4(\text{PPh}_3)_2$  (**8**) in KBr.

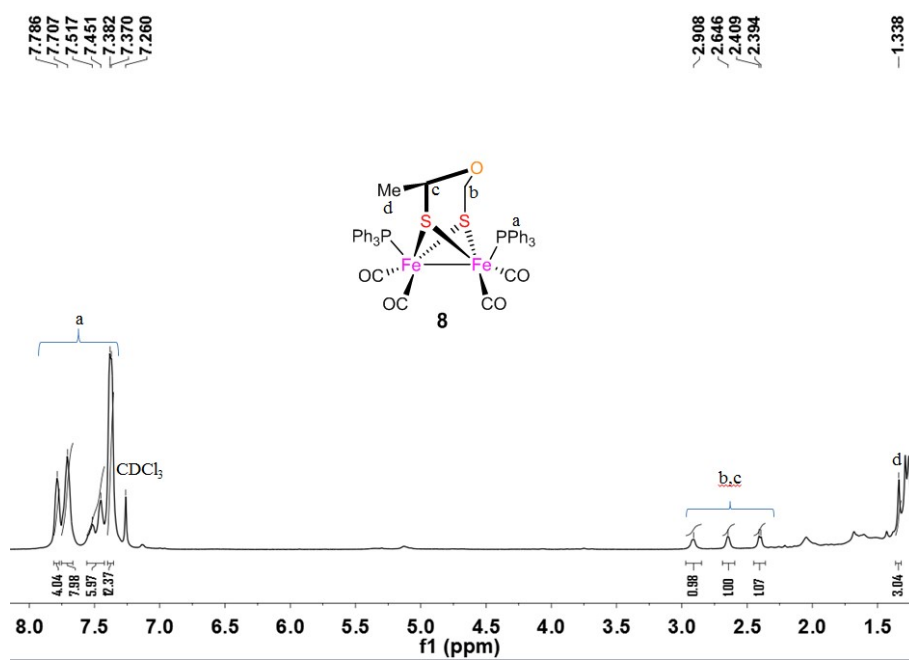

**Figure S38.**  $^1\text{H}$  NMR spectrum of  $\text{Fe}_2(\mu\text{-Meodt})(\text{CO})_4(\text{PPh}_3)_2$  (**8**) in  $\text{CDCl}_3$  (600 MHz, TMS).

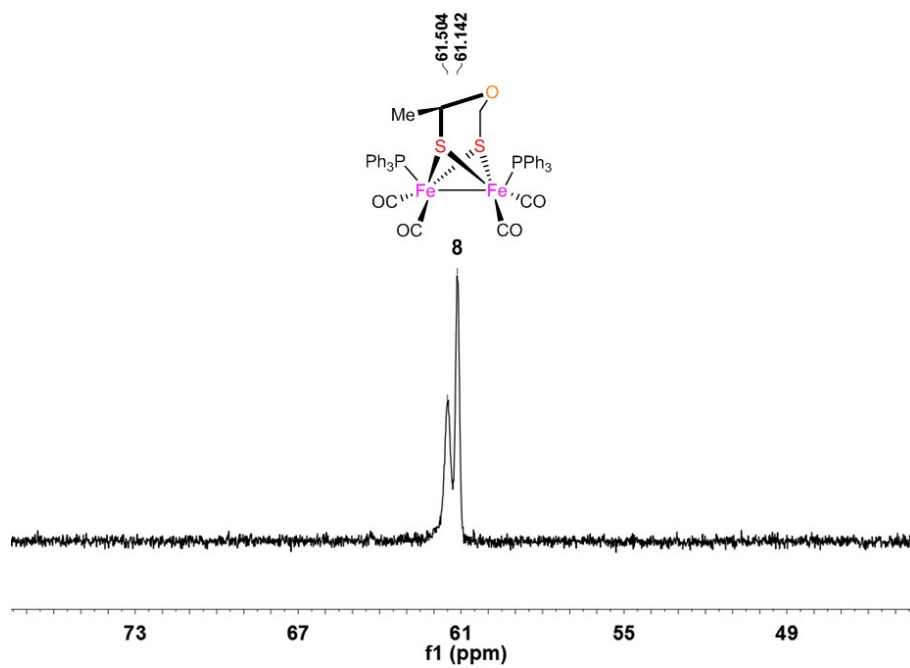

**Figure S39.**  $^{31}\text{P}\{^1\text{H}\}$  NMR spectrum of  $\text{Fe}_2(\mu\text{-Meodt})(\text{CO})_4(\text{PPh}_3)_2$  (**8**) in  $\text{CDCl}_3$  (243 MHz, 85%  $\text{H}_3\text{PO}_4$ ).



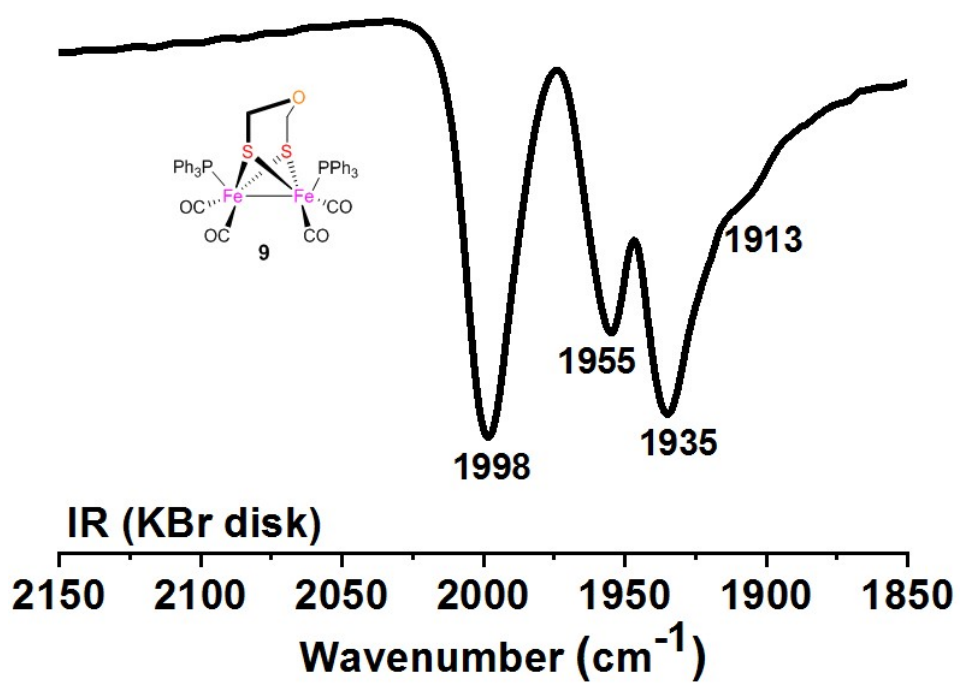

**Figure S40.** FT-IR spectrum of  $\text{Fe}_2(\mu\text{-odt})(\text{CO})_4(\text{PPh}_3)_2$  (**9**) in KBr.

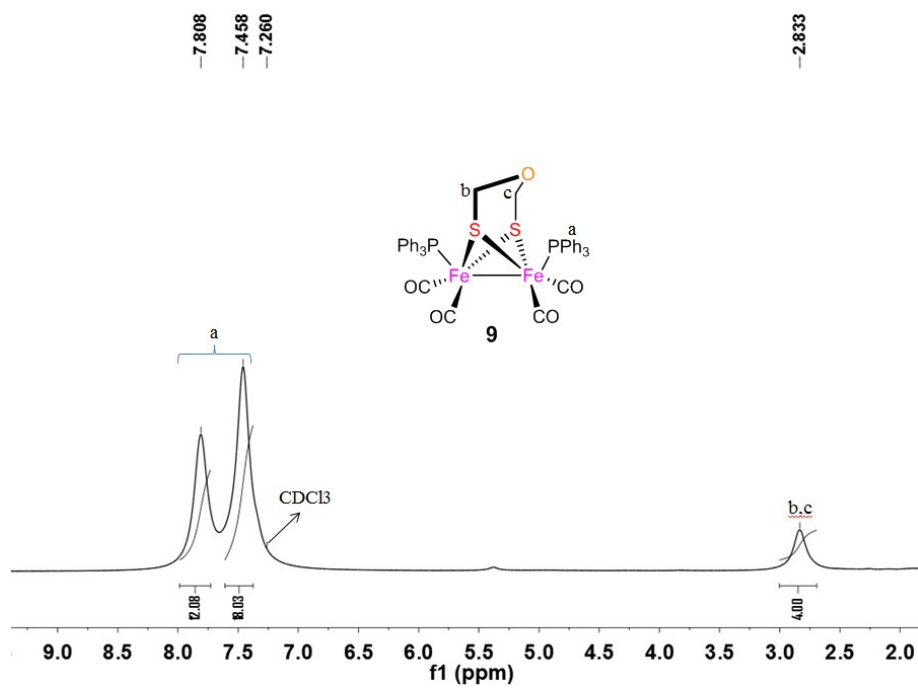

**Figure S41.**  $^1\text{H}$  NMR spectrum of  $\text{Fe}_2(\mu\text{-odt})(\text{CO})_4(\text{PPh}_3)_2$  (**9**) in  $\text{CDCl}_3$  (600 MHz, TMS).

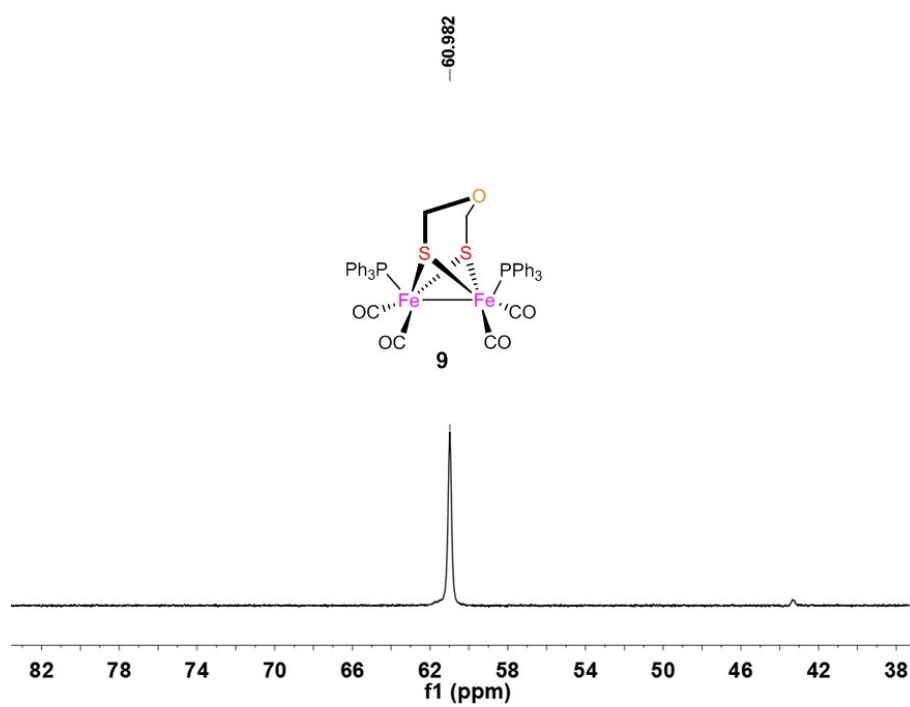

**Figure S42.**  $^{31}\text{P}\{^1\text{H}\}$  NMR spectrum of  $\text{Fe}_2(\mu\text{-odt})(\text{CO})_4(\text{PPh}_3)_2$  (**9**) in  $\text{CDCl}_3$  (243 MHz, 85%  $\text{H}_3\text{PO}_4$ ).
